## 1 **CD38 promotes hematopoietic stem cell dormancy via c-Fos**

2 Liliia Ibneeva <sup>1</sup>, Sumeet Pal Singh <sup>2</sup>, Anupam Sinha <sup>1</sup>, Sema Elif Eski <sup>2</sup>, Rebekka Wehner <sup>3,4,5</sup>,  
3 Luise Rupp <sup>3</sup>, Juan Alberto Pérez-Valencia <sup>1</sup>, Alexander Gerbaulet <sup>3</sup>, Susanne Reinhardt <sup>6</sup>,  
4 Manja Wobus <sup>7</sup>, Malte von Bonin <sup>7</sup>, Jaime Sancho <sup>8</sup>, Frances Lund <sup>9</sup>, Andreas Dahl <sup>6</sup>, Marc  
5 Schmitz <sup>3,4,5</sup>, Martin Bornhäuser <sup>5,7</sup>, Triantafyllos Chavakis <sup>1</sup>, Ben Wielockx <sup>1,10</sup>, Tatyana  
6 Grinenko <sup>1,10</sup>

7 <sup>1</sup> Institute for Clinical Chemistry and Laboratory Medicine, University Hospital and Faculty of  
8 Medicine, Technische Universität Dresden, Dresden, Germany

9 <sup>2</sup> IRIBHM, Université Libre de Bruxelles (ULB), Brussels, Belgium

10 <sup>3</sup> Institute for Immunology, Faculty of Medicine Carl Gustav Carus, Technische Universität  
11 Dresden, Germany

12 <sup>4</sup> National Center for Tumor Diseases (NCT), Partner Site Dresden, Dresden, Germany

13 <sup>5</sup> German Cancer Consortium (DKTK), Partner Site Dresden, and German Cancer Research  
14 Center (DKFZ), Heidelberg, Germany

15 <sup>6</sup> DRESDEN-concept Genome Center, Center for Molecular and Cellular Bioengineering,  
16 Technische Universität Dresden, Dresden, Germany

17 <sup>7</sup> Medical Clinic I, University Hospital Carl Gustav Carus, Technische Universität Dresden,  
18 Dresden, Germany

19 <sup>8</sup> Instituto de Parasitología y Biomedicina "López-Neyra" CSIC, Granada, Spain

20 <sup>9</sup> Department of Microbiology, University of Alabama at Birmingham, Birmingham, AL, USA

21 <sup>10</sup> Senior authors

22 **Corresponding author** – Dr. Tatyana Grinenko, Medizinisch-Teoretisches Zentrum,  
23 Fiedlerstrasse 42 01307 Dresden, Germany. [Tatyana.grinenko@uniklinikum-dresden.de](mailto:Tatyana.grinenko@uniklinikum-dresden.de),  
24 phone: +49 351 458-6259, fax: +49 351 458-6301

### 25 **Conflict of interests**

26 The authors have declared that no conflict of interest exists.

27

28

29

30

31

32

33

34

35

## 36 **Abstract**

37           A subpopulation of deeply quiescent, so-called dormant hematopoietic stem cells  
38 (dHSCs) resides at the top of the hematopoietic hierarchy and serves as a reserve pool for  
39 HSCs possessing the greatest long-term blood repopulation capacity. The state of dormancy  
40 protects the HSC pool from exhaustion throughout life, however excessive dormancy may  
41 block an efficient response to hematological stresses. The mechanisms of HSC dormancy  
42 remain elusive, mainly due to the absence of surface markers that allow dHSC prompt  
43 isolation. Here, we identify CD38 as a novel surface marker for murine dHSCs that is broadly  
44 applicable. Moreover, we demonstrate that cyclic adenosine diphosphate ribose (cADPR), the  
45 product of CD38 cyclase activity, regulates the expression of the transcription factor c-Fos by  
46 increasing cytoplasmic Ca<sup>2+</sup> concentration. Strikingly, we uncover that c-Fos drives HSCs  
47 dormancy through the induction of the cell cycle inhibitor p57<sup>Kip2</sup>. Moreover, we found that  
48 CD38 ecto-enzymatic activity at the neighboring CD38-positive cells can promote human HSC  
49 quiescence. Together, CD38/cADPR/Ca<sup>2+</sup>/cFos/p57<sup>Kip2</sup> axis maintains HSC dormancy.  
50 Pharmacological manipulations of this pathway can provide new strategies to expand dHSCs  
51 for transplantation or to activate them during hematological stresses.

52

## 53 **Introduction**

54           Hematopoietic stem cells (HSCs) are responsible for the production of all blood cells  
55 during life. Adult HSCs are maintained in a quiescent state, which is thought to protect them  
56 not only from replicative and metabolic stresses but also from the accumulation of somatic  
57 mutations; thus, loss of quiescence could lead to their exhaustion or malignant transformation  
58 (1-4). Conversely, excessive quiescence can lead to the generation of too few blood cells,  
59 which can result in reduced immune responses and greater infection susceptibility. Therefore,  
60 tight regulation of the balance between HSC quiescence and activation is critical for effective  
61 hematopoiesis under normal and stress conditions.

62 Numerous studies have demonstrated that 20–30% of murine HSCs are deeply  
63 quiescent, that they do not produce cells under homeostatic conditions, and that these  
64 ‘dormant’ HSCs (dHSCs) (4) harbor the greatest long-term repopulation capacity in  
65 transplantation assays (4-6). Thus, dHSCs serve as a reserve pool of stem cells that are  
66 activated only in response to stress signals such as interferons, lipopolysaccharide, and  
67 myeloablation, thereby demonstrating their importance in organismal stress resistance and  
68 recovery after chemotherapy (4, 7). However, despite the importance of mechanisms that  
69 switch HSCs from dormant to active state, detailed characterization of such dHSCs has been  
70 challenging due to the absence of known surface markers for their ready identification and  
71 isolation. Consequently, processes involved in the preservation of dHSC quiescence are  
72 poorly understood.

73 Recently, Cabezas-Wallscheid et al., have established a Gprc5c (retinol receptor)  
74 reporter mouse strain and have shown that retinoic acid signaling and hyaluronic acid could  
75 regulate HSC dormancy (6, 8). Fukushima et al., used another p27 (Cdk inhibitor) reporter  
76 mouse strain to reveal that HSC entry in to the cell cycle is controlled by Cdk4/6 and that high  
77 cytosolic Ca<sup>2+</sup> concentration correlates with HSC quiescence (9). However, why dHSCs harbor  
78 high cytosolic Ca<sup>2+</sup> concentration and how Ca<sup>2+</sup> regulates HSC dormancy remain unclear.  
79 Here, we identify that CD38 is not only the surface marker for the isolation of murine dHSCs  
80 but also describe a previously unknown signaling axis driven by the ecto-enzymatic activity of  
81 CD38 controlling HSC dormancy. Mechanistically, we show that cyclic adenosine diphosphate  
82 ribose (cADPR), the product of nicotinamide adenine dinucleotide (NAD) conversion by CD38,  
83 regulates the expression of the transcription factor c-Fos, thereby driving quiescence in a  
84 p57<sup>Kip2</sup>-dependent manner.

85

## 86 **Results**

### 87 **Pseudotime analysis of HSCs reveals the transition between proliferation and** 88 **dormancy**

89 To capture the transition between quiescence and proliferation, HSCs from young mice  
90 were subjected to single cell RNA sequencing, and after quality control, the transcriptome  
91 profiles of 1613 individual HSCs were used for downstream analysis (Fig. 1A). To identify  
92 actively cycling cells, we calculated cell cycle and dormancy scores of individual HSCs using  
93 Seurat (10), which were based on the expression levels of cell cycle and dormancy genes (11)  
94 (Suppl. Table 1). We observed that cells in the S (Fig. 1B) and the G2/M phases (Fig. 1C)  
95 were clustered together and that, as expected, most of the HSCs were quiescent (Fig. 1D).  
96 Further, comparison of Fig. 1A with Fig. 1B–D showed that pseudotime ordering was  
97 congruent with the transition from proliferation to dormancy. Next, we applied pseudotime  
98 ordering (Fig. 1A) to identify gene expression patterns that correlate with cell cycle dynamics  
99 (Fig. 1E) and identified three major gene expression clusters, namely, 1 - Early, 2 -  
100 Intermediate, and 3 - Late genes, according to peak expression in relation to pseudotime (Fig.  
101 1E, Suppl. Table 2). Functional annotation of each cluster revealed that Early and Intermediate  
102 genes were typically related to cell cycle activation pathways (Fig. 1F, Suppl. Table 3). In  
103 contrast, Late genes included well-known markers of HSCs with high transplantation potential,  
104 i.e., *Vwf* (12), *Procr* (13), *Fgd5* (14, 15), and the cell cycle inhibitor *Cdkn1c* (16, 17) (Fig. 1G,  
105 Fig. S1 A, B). Notably, this cluster was characterized by genes involved in pathways related  
106 to the activation of tumor necrosis factor alpha (TNF $\alpha$ ) signaling, interferon gamma and alpha  
107 response, Stat3 and Stat5, as well as transforming growth factor beta 1 (TGF- $\beta$ 1) signaling,  
108 which is a well-known regulator of HSC quiescence (18) (Fig. 1F, Suppl. Table 3). Next, we  
109 attempted to isolate cell surface markers within the group of Late genes (Suppl. Table 2)  
110 associated with HSC dormancy and identified *Cd38* as a putative marker for dHSCs because  
111 its expression was higher in cells with high dormancy scores and corresponded with  
112 expression of well-known long-term HSC (LT-HSC) markers (Fig. 1 G, H).

### 113 **CD38<sup>+</sup> LT-HSCs harbor the highest repopulation capacity**

114 We analyzed surface expression of CD38 on hematopoietic stem and progenitor cells  
115 (HSPCs), and showed that CD38 was expressed by fractions of LT-HSCs (Lin<sup>-</sup> c-Kit<sup>+</sup> Sca-1<sup>+</sup>

116 (LSK) CD48<sup>-</sup> CD150<sup>+</sup> CD34<sup>-</sup> CD201<sup>+</sup>; 36.6 ± 2.5%), HSCs (LSK CD48<sup>-</sup> CD150<sup>+</sup>; 12.4 ± 0.7%)  
117 and multipotent progenitors 2 (MPP2, LSK CD48<sup>+</sup> CD150<sup>+</sup>; 15.3 ± 1.8%) but not short-term  
118 HSCs (ST-HSCs, LSK CD48<sup>-</sup> CD150<sup>-</sup>) or multipotent progenitors 3/4 (MPP3/4, LSK CD48<sup>+</sup>  
119 CD150<sup>-</sup>) (Fig. 2A-B, Fig. S2 A, B). Next, we subdivided HSCs based on CD38 surface  
120 expression as CD38<sup>+</sup> and CD38<sup>-</sup> stem cells and compared the expression of well-known  
121 surface markers defining the most potent LT-HSCs (4, 19-23), and revealed that, compared  
122 to CD38<sup>-</sup> HSCs, surface expression of CD34, CD229, and c-Kit were lower, while that of  
123 CD201, Sca-1, CD150 were higher in CD38<sup>+</sup> HSCs (Fig. S2C). In line with these data, the  
124 frequency of LT-HSCs was higher among CD38<sup>+</sup> HSCs compared to other fractions of the  
125 HSCs (Fig. 2C). Together, these data indicate that CD38<sup>+</sup> HSCs display a phenotype identical  
126 to that of the most potent and quiescent LT-HSCs (4, 19-23).

127         Only a fraction of LT-HSCs ((LSK) CD48<sup>-</sup> CD150<sup>+</sup> CD34<sup>-</sup> CD201<sup>+</sup>) expresses CD38.  
128 To assess whether CD38 expression correlates with the superior repopulation capacity within  
129 LT-HSCs, we transplanted CD38<sup>+</sup> and CD38<sup>-</sup> LT-HSCs into lethally irradiated mice under  
130 competitive settings (Fig. 2D). While CD38<sup>-</sup> LT-HSCs produced more short-lived neutrophils  
131 four weeks after transplantation, CD38<sup>+</sup> LT-HSCs repopulated the HSC compartment and  
132 peripheral blood (PB) more efficiently at 20 weeks after primary transplantation and after  
133 secondary transplantation as well (Fig. 2 E–G). Further, no lineage bias was observed in the  
134 reconstitution pattern of CD38<sup>+</sup> and CD38<sup>-</sup> LT-HSCs (Fig. 2H). These results demonstrate the  
135 superior repopulation and self-renewal capacity of CD38<sup>+</sup> cells compared to CD38<sup>-</sup> LT-HSCs.

136         To understand the hierarchy between CD38<sup>+</sup> and CD38<sup>-</sup> LT-HSCs, we compared the  
137 expression of CD38 on the progeny of donor HSCs and found that, while CD38<sup>+</sup> LT-HSCs  
138 gave rise to both CD38<sup>-</sup> and CD38<sup>+</sup> HSCs, CD38<sup>-</sup> cells could not generate CD38<sup>+</sup> HSCs (Fig.  
139 2I). Taken together, these results indicate that CD38<sup>+</sup> LT-HSCs reside at the top of the  
140 hematopoietic cell hierarchy. We propose that the CD38 surface marker can be used atop to  
141 the well-established immuno-phenotype of LSK CD48<sup>-</sup> CD150<sup>+</sup> CD34<sup>-</sup> CD201<sup>+</sup> to define the  
142 most potent LT-HSCs.

## 143 **High levels of surface CD38 define dormant HSCs**

144 We performed cell cycle analyses, bromodeoxyuridine (BrdU) incorporation, and long-  
145 term label-retaining assays to investigate whether CD38 expression correlates with stem cells'  
146 dormancy (Fig. 3A-F). CD38<sup>+</sup> HSCs mostly resided in G0 phase compared with CD38<sup>-</sup> HSCs  
147 (Fig. 3A). While LT-HSC markers already enrich for more quiescent cells, CD38<sup>+</sup> LT-HSCs  
148 contained an even higher frequency of cells in G0 phase than CD38<sup>-</sup> LT-HSCs (Fig. 3B).  
149 Accordingly, CD38<sup>+</sup> LT-HSCs incorporated BrdU significantly slower and retained higher  
150 levels of H2B-GFP after 130 days of chase compared with CD38<sup>-</sup> cells (Fig. 3D-F), revealing  
151 that CD38<sup>+</sup> LT-HSCs are more quiescent than their CD38<sup>-</sup> counterparts (24). Moreover, CD38<sup>+</sup>  
152 LT-HSCs had lower mitochondrial membrane potential (MMP) than CD38<sup>-</sup> stem cells, despite  
153 no difference in mitochondrial mass (Fig. S2 D, E), which is in agreement with previous  
154 findings that HSC quiescence is associated with a lower metabolic status (6, 25).

155 Next, to investigate cell cycle entry of CD38<sup>+</sup> LT-HSCs in response to hematopoietic  
156 stressors, mice were administered anti-platelet serum to mimic acute autoimmune  
157 thrombocytopenia (26), polyI:polyC (pIC) mimicking viral infection (6), or 5-fluorouracil (5-FU),  
158 a myeloablative agent. We found that while CD38<sup>-</sup> LT-HSCs partially proliferated in response  
159 to platelet depletion, CD38<sup>+</sup> LT-HSCs retained their quiescence (Fig. 3G). Likewise, while  
160 CD38<sup>-</sup> LT-HSC rapidly entered the cell cycle in response to pIC, fewer CD38<sup>+</sup> LT-HSCs  
161 entered the cell cycle and did so with a significant delay (Fig. 3H, S2F). In contrast, both CD38<sup>-</sup>  
162 and CD38<sup>+</sup> LT-HSCs actively proliferated 4 days after 5-FU injection (Fig. 3I). Although CD38<sup>+</sup>  
163 LT-HSCs tended to restore their quiescence 8 days after 5-FU injection, CD38<sup>-</sup> cells remained  
164 in the cell cycle. Thus, as CD38<sup>+</sup> LT-HSCs required more time to enter the cell cycle in  
165 response to hematological stresses and returned faster to quiescence compared to CD38<sup>-</sup>  
166 cells, we posit that high levels of CD38 expression define dormant LT-HSCs not only in steady  
167 state but also under hematopoietic stress. Taken together, we classified CD38<sup>+</sup> LT-HSCs as  
168 dHSCs.

## 169 **CD38 enzymatic activity regulates dHSC quiescence**

170 To understand whether CD38 is directly involved in the maintenance of dHSCs, we  
171 compared long-term repopulation and self-renewal capacities of wild-type (wt) and CD38  
172 knock-out (CD38KO) LT-HSCs. We did not find any difference in composition of PB or bone  
173 marrow at steady state (Fig. S3 A–F). Although only about 40% of LT-HSC in wt mice express  
174 CD38, we found that long-term repopulation and self-renewal capacity of CD38KO LT-HSC  
175 were lower than those of wt cells (Fig. S3 G–K). In line with this finding, CD38KO total bone  
176 marrow (TBM) cells had diminished long-term repopulation capacity compared with wt TBM  
177 (Fig. S3L–P). Together, these results suggest that CD38 regulates the functionality of LT-  
178 HSCs.

179 CD38 is a multifaceted NAD catabolic ecto-enzyme that metabolizes NAD and its  
180 precursors (nicotinamide mononucleotide-NMN and nicotinamide riboside-NR) into adenosine  
181 diphosphate ribose (ADPR) and cyclic-ADPR (cADPR) (27) (Fig. 4A). 78c is a specific CD38  
182 inhibitor that hinders both hydrolase and ADP-ribosyl cyclase activities of CD38 (28). To  
183 investigate whether the enzymatic activity of CD38 regulates the quiescence of LT-HSCs, we  
184 performed single-cell tracing experiments wherein LT-HSC division in the presence of 78c was  
185 tracked (Fig. S4 A–C, Fig. 4B–C). In agreement with our previous data (Fig. 3), CD38<sup>+</sup> cells  
186 were more quiescent than CD38<sup>-</sup> LT-HSCs, whereas inhibition of CD38 by 78c accelerated  
187 the first division of CD38<sup>+</sup> but not CD38<sup>-</sup> LT-HSCs or LT-HSCs from CD38KO mice (Fig. 4B-  
188 C, Fig. S4 A–C), supporting the idea that CD38 enzymatic activity indeed contributes to  
189 maintenance of dHSC quiescence.

190 Both products of CD38 enzymatic activity, i.e., ADPR and cADPR, increase cytosolic  
191 Ca<sup>2+</sup> concentration ([Ca<sup>2+</sup>]<sub>c</sub>) in several cell types (29–31) (Fig. 4A) and high cytoplasmic Ca<sup>2+</sup>  
192 has been shown to support quiescence of HSCs (9). Consistently, we show that [Ca<sup>2+</sup>]<sub>c</sub> is  
193 indeed higher in CD38<sup>+</sup> LT-HSCs than in CD38<sup>-</sup> cells when measured using Ca<sup>2+</sup>-indicator  
194 dyes, Fluo-8AM and Indo-1 (Fig. 4D). Additionally, while treatment of cells with 8-Bromo-  
195 ADPR (a cell-permeable antagonist that blocks ADPR-dependent Ca<sup>2+</sup> release) did not  
196 influence either [Ca<sup>2+</sup>]<sub>c</sub> or cell cycle activity of HSCs (Fig. S4 D,E), blocking cADPR-dependent



197  $\text{Ca}^{2+}$  release from the endoplasmic reticulum by the 8-Bromo-cADPR antagonist reduced  
198  $[\text{Ca}^{2+}]_c$  in HSCs (Fig. 4E) and promoted their cell cycle entry (Fig. 4F). To confirm that CD38  
199 truly regulates  $[\text{Ca}^{2+}]_c$  in HSCs we used thapsigargin (TG), which inhibits  $\text{Ca}^{2+}$  transport from  
200 the cytoplasm into the ER. As expected (Fig 4G),  $[\text{Ca}^{2+}]_c$  increased significantly faster in CD38<sup>+</sup>  
201 HSCs compared to CD38<sup>-</sup> cells (Fig. 4H–I) and this difference was abrogated by treatment  
202 with 78c, the CD38 inhibitor (Fig. 4J), suggesting that  $\text{Ca}^{2+}$  release from the ER in CD38<sup>+</sup>  
203 HSCs is mediated by CD38. Together, these data suggest that CD38-dependent cADPR but  
204 not ADPR production contributes to high  $[\text{Ca}^{2+}]_c$  concentration in dHSCs, which maintains their  
205 quiescence.

206 Human HSCs (hHSC) are CD38<sup>lo/-</sup> (Fig. S5 A-B) (32), therefore we investigated  
207 whether the CD38 ecto-enzymatic activity at the neighboring CD38-positive cells may regulate  
208 hHSC quiescence. Indeed, we cultured hHSCs together with CD38<sup>+</sup> tumor cell line (Fig. S5B)  
209 and found that inhibition of CD38 enzymatic activity by 78c inhibitor (Fig. S5C) led to the cell  
210 cycle entrance of hHSCs (Fig. 4K). Therefore, CD38 can regulate hHSC quiescence in a  
211 paracrine fashion.

## 212 **c-Fos regulates quiescence of dHSCs**

213 To clarify how the CD38/cADPR/ $\text{Ca}^{2+}$  axis regulates HSC dormancy, we performed a  
214 bulk transcriptome RNA sequencing of CD38<sup>+</sup> and CD38<sup>-</sup> LT-HSCs (LSK CD48<sup>-</sup> CD150<sup>+</sup>  
215 CD34<sup>-</sup> CD201<sup>+</sup>) and found that while 205 genes were significantly down-regulated in CD38<sup>+</sup>  
216 LT-HSCs, 225 were up-regulated (Fig. 5A, Supp. Table 4). Gene set enrichment analysis  
217 (GSEA) revealed a significant down-regulation of genes related to hematopoietic stem cell  
218 differentiation programs, mitochondrial respiratory chain complex assembly, and NADH  
219 dehydrogenase complex in CD38<sup>+</sup> dHSCs compared to CD38<sup>-</sup> LT-HSCs. Similarly, gene sets  
220 controlling the response to calcium ions, extracellular matrix interaction, and TGF- $\beta$ 1 response  
221 were up-regulated in CD38<sup>+</sup> dHSCs (Fig. 5 B, C). HSC-related genes, such as *Hoxb9*, *H19*,  
222 *VwF*, *Clu*, and *Sele* (12, 33-36), as well as genes associated with HSC dormancy, namely,  
223 *Gprc5c*, *Meis2* (6), and *Neo1* (37), were up-regulated in CD38<sup>+</sup> dHSCs (Fig. 5D). We did not



224 find significant differences in *Cdk2*, *Cdk4*, *Cdk6*, and *CyclinD1* expression but CD38<sup>+</sup> dHSCs  
225 expressed the cell cycle inhibitors *Cdkn1a* and *Cdkn1c* at higher levels than CD38<sup>-</sup> LT-HSCs  
226 (Fig. 5E). Intriguingly, the transcription factor *Fos*, whose expression was previously correlated  
227 to cell cycle activation (38), was one of the most significantly upregulated genes in CD38<sup>+</sup>  
228 dHSCs, and this observation was further corroborated by the fact that CD38<sup>+</sup> dHSCs displayed  
229 higher levels of transcriptionally active phosphorylated c-Fos (at Threonine 232, p-c-Fos) (39)  
230 compared to CD38<sup>-</sup> LT-HSCs (Fig. 5F, Fig. S4F).

231 Correspondingly, single-cell tracking analysis revealed that blocking c-Fos interaction  
232 with DNA using a specific inhibitor, T-5224 (40), induced division of CD38<sup>+</sup> dHSCs but not  
233 CD38<sup>-</sup> LT-HSCs (Fig. 6A–C). Moreover, administering T-5224 to mice led to the partial loss of  
234 quiescence in CD38<sup>+</sup> HSCs but not in CD38<sup>-</sup> counterparts (Fig. 6D). These data suggest that  
235 c-Fos transcriptional activity is necessary for CD38-mediated dHSCs quiescence. As inhibiting  
236 the transcriptional activity of c-Fos affected cell cycle entrance of CD38<sup>+</sup> dHSCs but not CD38<sup>-</sup>  
237 LT-HSCs, we hypothesized that CD38 regulates c-Fos expression via cADPR/Ca<sup>2+</sup> (Fig. 6E).  
238 Indeed, treatment of HSCs with a cADPR antagonist (Br-cADPR) reduced the levels of active  
239 p-c-Fos (Fig. 6E), supporting the notion that the CD38/cADPR/Ca<sup>2+</sup> axis regulates c-Fos levels  
240 in dHSCs.

#### 241 **CD38 controls p57<sup>kip2</sup> expression in dHSCs via c-Fos**

242 To gain mechanistic insight into how CD38 and c-Fos regulate HSC dormancy, we  
243 analyzed the presence of c-Fos binding motifs in the regulatory regions of stem cell-related  
244 genes that were upregulated in CD38<sup>+</sup> dHSCs (Fig. 5D, E) and found that several genes,  
245 including *Cdkn1c*, a well-known regulator of HSC quiescence (17), have c-Fos binding motifs  
246 (Suppl. Table 5). Therefore, it is possible that c-Fos blocks cell cycle entrance of dHSCs  
247 through *Cdkn1c* expression. Indeed, we confirm that not only expression of the *Cdkn1c* gene  
248 (Fig. 5E) but also that of its gene product, p57<sup>kip2</sup> protein, is higher in CD38<sup>+</sup> dHSCs than in  
249 CD38<sup>-</sup> LT-HSCs (Fig. 6F). Furthermore, inhibition of the interaction between DNA and c-Fos  
250 or the CD38 enzymatic activity led to a reduction in p57<sup>kip2</sup> protein expression (Fig. 6 G, H),

251 thereby supporting our hypothesis that CD38 activates *Cdkn1c* expression in dHSCs via c-  
252 Fos.

253

## 254 **Discussion**

255 We identify CD38 as a novel surface marker that enables isolation of the most dormant  
256 population of LT-HSCs. Mechanistically, we demonstrate that CD38 itself regulates stem cell  
257 dormancy by shuttling intracellular  $[Ca^{2+}]_c$  in a CD38/cADPR-dependent manner, which results  
258 in a consequent increase in c-Fos and the expression of the cell cycle inhibitor  $p57^{kip2}$  (Fig.  
259 6H).

260 The gene expression profile of single HSCs revealed that their heterogeneity is  
261 predominantly determined by genes related to the cell cycle, which is in agreement with  
262 previous findings (41). We found that *Cd38* expression is inversely correlated with that of cell  
263 cycle activators but positively associated with the cell cycle inhibitor *Cdkn1c* and other well-  
264 known genes that define the most quiescent LT-HSCs, such as *Vwf*, *Procr*, *Fgd5*, and *Gprc5c*  
265 (6, 12, 13, 15). Importantly, our results indicate that CD38<sup>+</sup> dHSCs reside at the top of the  
266 hematopoietic hierarchy, that they have the highest repopulation capacity upon serial  
267 transplantation, and that they are the most quiescent stem cells both under steady-state  
268 conditions and in response to a variety of hematopoietic perturbations, i.e., they have the  
269 characteristics of dHSCs (4). Hence, CD38 represents a marker that will help circumvent the  
270 limitations of the long-term label-retaining assays (4, 5, 24, 42) or even negate the necessity  
271 of reporter mice (6, 9) for studying the mechanisms underlying HSC dormancy. Notably, while  
272 it is established that the bone marrow niche cells maintain HSCs in the quiescent state (43),  
273 little is known about which niche cells are maintaining HSCs dormant. The use of CD38 will  
274 allow dHSC imaging to clarify the localization of dHSCs in bone marrow niche. Moreover,  
275 CD38 is an ecto-enzyme, and we describe, for the first time, the mechanism involved in HSCs'  
276 dormancy, i.e., autocrine regulation via cADPR. Nonetheless, both substrates and products of

277 its enzymatic activity could also potentially regulate the niche cells neighboring dHSCs,  
278 suggesting that dHSCs may also actively modulate their local microenvironment in a paracrine  
279 fashion.

280         Indeed, we found that CD38 enzymatic activity on neighboring cells regulated the  
281 proliferation of CD38-negative hHSCs. Interestingly, several hematological malignancies  
282 (chronic myeloid leukemia, acute myeloid leukemia, acute lymphoblastic leukemia, and  
283 multiple myeloma) express CD38 at a high level (44). We hypothesize that tumour  
284 microenvironment enriched in the products of CD38 ecto-enzymatic activity may keep healthy  
285 HSCs in the quiescent state leading to cancer-related pancytopenia as well as it may preserve  
286 the dormancy of cancer stem cells leading to disease persistence. Therefore, a better  
287 understanding of the mechanisms controlling human HSC dormancy is required to support  
288 healthy hematopoiesis in patients with hematologic malignancies and develop more powerful  
289 strategies for cancer eradication.

290         Recently, Fukushima et al. have shown that high intracellular  $[Ca^{2+}]_i$  prevents cell cycle  
291 entry of LT-HSCs (9). In line with this finding, we show that CD38<sup>+</sup> dHSCs had higher  $[Ca^{2+}]_i$   
292 than CD38<sup>-</sup> LT-HSCs, that cADPR, the product of CD38/NAD catabolic activity (27), is  
293 responsible for the high  $[Ca^{2+}]_i$  in LT-HSCs, and that it directly correlates with the up-regulation  
294 of *Fos* gene expression and phosphorylated c-Fos protein. Importantly, these observations  
295 are in agreement with the finding that the upstream regulatory region of the *Fos* gene contains  
296 a cyclic-AMP response element (CRE) DNA motif, which is critical for the activation of *Fos*  
297 transcription by  $Ca^{2+}$  (46).

298         Generally, *Fos* is known as one of the immediate early genes that is transiently  
299 expressed in stimulated cells, leads to cell cycle progression (47, 48), and is a positive  
300 regulator of myeloid differentiation (49). Besides, c-*Fos* is an oncogene, whose expression is  
301 often upregulated in hematologic malignancies, e.g., in chronic and acute myeloid leukemia  
302 (50, 51). In contrast, our data clearly reveal that inhibiting the interaction between c-Fos and  
303 DNA in dHSCs reduced protein levels of the cell cycle inhibitor p57<sup>kip2</sup> and stimulated cell cycle

304 entry. Therefore, c-Fos can activate multiple transcriptional programs in a cell type-specific  
305 manner and as its role in hematopoiesis regulation is very complex, further investigations are  
306 required.

307 In summary, we reveal that the CD38/cADPR/Ca<sup>2+</sup>/c-Fos/p57<sup>kip2</sup> axis regulates HSC  
308 dormancy. Manipulation of this axis can potentially stimulate dHSC expansion and their  
309 efficient response to a variety of hematopoietic stresses. Importantly, the introduction of a new  
310 surface marker for the isolation of dHSCs opens up avenues for future research addressing  
311 mechanisms that regulate dormant and active states.

## 312 **Methods**

### 313 **Reagents and resources**

314 Supplemental Table 6 lists all reagents used.

### 315 **Mice**

316 C57BL/6N (B6), B6.SJL-Ptprc<sup>a</sup>Pep3<sup>b</sup>/BoyJ (SJL) were purchased from The Jackson  
317 Laboratory. C57BL/6N (B6) and B6.SJL-Ptprc<sup>a</sup>Pep3<sup>b</sup>/BoyJ (SJL) mice were crossed to  
318 produce F1 progeny (CD45.1/CD45.2) for transplantation experiments. To study the division  
319 history of HSCs, R26<sup>rtTA</sup>/ *Col1A1*<sup>H2B-GFP</sup> mice were used (5); the induction of H2B-GFP  
320 expression was performed as described in (24). B6.129P2-Cd38<sup>tm1Lnd</sup>/J (CD38KO) mice were  
321 obtained from Dr. Jaime Sancho and Dr. Frances Lund. Ki67<sup>RFP</sup> knock-in mice have been  
322 described previously (52, 53). All mice were bred and maintained under specific pathogen–  
323 free conditions in the animal facility at the Medical Theoretical Center of the Technical  
324 University, Dresden, Germany. Experiments were performed in accordance with the German  
325 animal welfare legislation and were approved by the “Landesdirektion Sachsen”. Unless  
326 specified otherwise, 8–16 week-old mice of both genders were used for experiments.

### 327 **Cell isolation and flow cytometry**

328 Cells were isolated from tibiae, femora, pelvis, and vertebrae by crushing bones in 5% fetal  
329 bovine serum (FBS) in phosphate-buffered saline (PBS) and passing them through a 40-um  
330 filter. Erythrocytes were lysed using ACK Lysing Buffer. To calculate the amount of cells, cells  
331 isolated from 2 tibiae and 2 femora were stained with DAPI at 0.1 ug/ml and DAPI-negative  
332 cells were counted using MACSQuant Analyzer (Myltenyi Biotec). For sort, cells were stained  
333 with c-Kit bio antibody and Anti-Biotin MicroBeads were added to enrich for c-Kit<sup>+</sup> cells using  
334 LS columns. HSCs were defined as Lin<sup>-</sup> (negative for B220, CD3ε, CD19, NK1.1, Gr1, Ter119,  
335 and CD11b) Sca1<sup>+</sup> c-Kit<sup>+</sup> (LSK) CD48<sup>-</sup> CD150<sup>+</sup> cells. LT-HSCs: LSK CD48<sup>-</sup> CD150<sup>+</sup> CD34<sup>-</sup>  
336 CD201<sup>+</sup>, MPP2: LSK CD48<sup>+</sup> CD150<sup>+</sup>, MPP3/4: LSK CD48<sup>+</sup> CD150<sup>-</sup>, and ST-HSCs: LSK CD48<sup>-</sup>  
337 CD150<sup>-</sup>. Granulocyte-monocyte progenitors (GMP) were defined as Lin<sup>-</sup> Sca1<sup>-</sup> c-Kit<sup>+</sup> (LK)  
338 CD16/32<sup>+</sup> CD150<sup>-</sup>, pre-megakaryocyte progenitors, PreMeg: LK CD16/32<sup>-</sup> CD41<sup>+</sup> CD150<sup>+</sup>,  
339 colony forming unit-erythroid, CfuE: LK CD16/32<sup>-</sup> CD41<sup>-</sup> CD105<sup>+</sup> CD150<sup>-</sup>, pre-colony forming  
340 unit-erythroid, PreCfuE: LK CD16/32<sup>-</sup> CD41<sup>-</sup> CD105<sup>+</sup> CD150<sup>+</sup>, megakaryocyte-erythroid  
341 progenitors, MEP: LK CD16/32<sup>-</sup> CD41<sup>-</sup> CD105<sup>-</sup> CD150<sup>+</sup>, common myeloid progenitors, CMP:  
342 LK CD16/32<sup>-</sup> CD41<sup>-</sup> CD105<sup>-</sup> CD150<sup>-</sup>. All analyses were performed on a BD LSR II, BD  
343 FACS Aria II, BD LSRFortessa X-20, or a BD FACSCanto II (BD Bioscience). Data were  
344 analyzed using FlowJo software 10.7.1 (BD Bioscience).

#### 345 **Single cell RNA sequencing with 10x Genomics and analysis**

346 LT-HSCs (LSK CD48<sup>-</sup> CD150<sup>+</sup>, 3000 cells) from four B6 mice were sorted into BSA-coated  
347 tube containing 5 µl of PBS with 0.04% BSA. All cells were carefully mixed with reverse  
348 transcription mix before loading them in a Chromium Single Cell A Chip on the 10X Genomics  
349 Chromium system (54) and processed further following the guidelines of the 10x Genomics  
350 user manual for Chromium Single Cell 3' RNA-seq Library v2. In short, the droplets were  
351 directly subjected to reverse transcription, the emulsion was broken and cDNA was purified  
352 using silane beads. After amplification of cDNA with 12 cycles, it underwent a purification with  
353 0.6 volume of SPRI select beads. After quality check and quantification, 20 µl cDNA was used  
354 to prepare single cell RNA-seq libraries - involving fragmentation, dA-Tailing, adapter ligation

355 and a 13 cycles indexing PCR based on manufacturer's guidelines. After quantification, both  
356 libraries were sequenced on an Illumina Nextseq500 system in paired-end mode with 26 bp/57  
357 bp (for read 1 and 2 respectively), thus generating ~50-80 mio. fragments for the transcriptome  
358 library on average. The raw count data generated from Cell Ranger pipeline was processed  
359 using Seurat v3.1 (10) by following the standard pipeline. Cells were filtered based on quality  
360 metrics (number of genes, total UMI counts, percentage of mitochondrial genes).  
361 Subsequently, filtered data were merged using "FindIntegrationAnchors" function of Seurat 3.  
362 For further analysis, merged data were log-normalized, regressed for library size, and  
363 percentage of mitochondrial genes and scaled. Cell cycle and dormancy scores were  
364 calculated with G2M and S phase genes from Seurat package and dormancy related genes  
365 (6) (see Suppl. Table 1) and using "AddModuleScore" function of Seurat 3. For pseudotime  
366 trajectory analysis, standard pipeline of Monocle 2 (54) was used and dimensionality reduction  
367 was performed using "reduceDimension" function of Monocle 2 with following parameters:  
368 num\_dim = 10, norm\_method = "log", reduction\_method = "tSNE", residualModelFormulaStr  
369 = "~Age". To visualize gene modules showing similar kinetic trends,  
370 "plot\_pseudotime\_heatmap" function was used accounting a list of genes showing significant  
371 score for differential expression along pseudotime (q-value < 0.05) and genes that change as  
372 a function of pseudotime were grouped in three clusters.

### 373 **Gene ontology analysis**

374 GO term analysis was performed using Enrichr (55). Complete gene list per clusters were  
375 obtained by using the "crisp gene set". For visualization, statistically significant (p-value < 0.05)  
376 terms were selected from top five pathways (see Supp. Table 3).

### 377 **LT-HSCs transplantation**

378 For primary transplantation, 50 CD38<sup>-</sup> or CD38<sup>+</sup> LT-HSCs (LSK CD48<sup>-</sup> CD150<sup>+</sup> CD34<sup>-</sup> CD201<sup>+</sup>)  
379 were sorted and transplanted together with 5×10<sup>5</sup> total BM competitor cells. For secondary

380 transplantation,  $5 \times 10^6$  CD45<sup>+</sup> total BM cells were transplanted into lethally irradiated  
381 recipients. Recipient mice were lethally irradiated (9 Gy), and the cells were injected i.v..

### 382 **Cell cycle analyses**

383 Cell cycle was analyzed using staining for Ki67 and DAPI as described before (26). To label  
384 dHSCs, mice were injected with 1 mg of BrdU i.p. and kept with 0.8 mg BrdU per 1 ml in  
385 drinking water for 14 more days before sacrificing. Water was changed every 3 days. BrdU  
386 incorporation analysis was performed using anti-BrdU antibody as described before (19).

### 387 ***In vivo* stress models and drug administration**

388 To mimic viral infection, pIC was administered i.p. at a dose of 5 mg/kg 18 or 48 h prior to  
389 analysis. To selectively deplete platelets, rabbit anti-mouse antiplatelet serum was injected  
390 i.p. 18 h prior to analysis. The effective dose of anti-platelet serum was determined before the  
391 use in experiments (26), and a dose resulting in  $<150 \times 10^3$  platelets per microliter of blood at  
392 2 h after the injection was considered suitable for experiments. Control mice were injected  
393 with the corresponding amount of normal rabbit serum. To study HSC response to  
394 chemotherapy, 5-FU was injected i.p. at a dose of 150 mg/kg 4 or 8 days prior to analysis. To  
395 study the effects of c-Fos inhibition, T-5224 in the vehicle (2% DMSO+30% PEG300+2%  
396 Tween80 in ddH<sub>2</sub>O) was injected i.p. at 30 mg/kg/mouse 18 h prior to analysis. Control mice  
397 were injected with the corresponding amount of vehicle.

### 398 **Intracellular calcium staining and flux**

399 Calcium staining and flux were estimated by flow cytometry. Cells were sequentially incubated  
400 with 0.3  $\mu$ M Fluo-8 AM for 1 h at room temperature and with 2  $\mu$ M Indo-1 and 0.02% Pluronic  
401 F-127 in HBSS for 30 min at 37°C, washed, and resuspended in HBSS. Wavelength filters for  
402  $405 \pm 20$ nm (violet emission) and  $530 \pm 30$ nm (450 LP filter, blue emission) were used to  
403 visualize Ca<sup>2+</sup>-bound and -unbound dye ratio by flow cytometry, respectively. After recording  
404 baseline calcium, thapsigargin (TG, 1 mM) was added to the sample to induce Ca<sup>2+</sup> flux.



405 Alternatively, 78c (1  $\mu$ M) was added to cells 5 min before TG. The average ratio, R, of  
406 bound/unbound Indo-1 (405nm/485nm emission) was calculated.

#### 407 **Single cell LT-HSCs *in vitro* culture**

408 Single long term-HSCs were sorted into 96-well plates containing StemSpan medium with 10  
409 ng/mL SCF, 10 ng/mL THPO, 20 ng/mL IGF2, and 10 ng/mL FGF1, with or without 1  $\mu$ M / 4  
410  $\mu$ M c-Fos inhibitor T-5224, 0.1  $\mu$ M CD38 inhibitor 78c, and cultured for 3 days at 37°C with  
411 5% CO<sub>2</sub>. The number of the cells per well was monitored twice daily under a light microscope.

#### 412 ***In vitro* treatment of LSK cells**

413 LSK cells from Ki67<sup>RFP</sup> mice were sorted and cultured (5 x 10<sup>4</sup> per well) in StemSpan medium  
414 with 10 ng/mL SCF, 10 ng/mL THPO, 20 ng/mL IGF2, and 10 ng/mL FGF1 with or without 25  
415 or 100  $\mu$ M 8-Br-cADPR or 25-100  $\mu$ M 8-Br-ADPR or 4  $\mu$ M T5224. 24 h later cells were stained  
416 with anti CD48, CD150, Kit, Sca-1 antibodies, and 0.3  $\mu$ M Fluo-8 AM. Alternatively, surface  
417 stained cells were fixed using eBioscience kit and HSCs were sorted on glass slides for  
418 immunofluorescent staining.

#### 419 **Immunofluorescent staining**

420 HSCs sorted on glass slides were used for the immunofluorescent staining. Cells were blocked  
421 with 20% horse serum in 1X Permeabilization buffer (eBioscience) for 30 min at RT, stained  
422 with rabbit anti-phospho-c-Fos or rabbit anti-p57 antibodies for 2h, washed and then incubated  
423 with secondary anti-rabbit AlexaFluor 488 antibody for 30 min. Cells were mounted using  
424 DAPI-containing mounting and sealed. Images were captured using a Leica TCS SP5 confocal  
425 microscope (Leica Microsystems) using 63x objective. From 6 to 8 z-stacks were taken per  
426 image and fluorescence was analyzed using Fiji (56).

#### 427 **Human HSC *in vitro* culture**

428 Bone marrow stem cell apheresates were collected from healthy donors at the Dresden Bone  
429 Marrow Transplantation Centre of the University Hospital Carl Gustav Carus. The donors  
430 fulfilled the standards for bone marrow donation (e.g. free of HIV, HBV, and serious illness),

431 were informed and gave their approval. The study was approved by the local ethics  
432 commission (EK263122004, EK114042009). MOLM-13 were obtained from ATCC.  
433 Mononuclear cells (MNCs) were isolated using Ficoll fractioning. Briefly, BM aspirates were  
434 layered on top of Ficoll-Paque PLUS media and centrifuged at 800g for 20 min at 20°C (brake  
435 off), MNCs were then isolated from buffy coat fraction in the interphase of Ficoll gradient.  
436 MNCs were incubated with anti-CD34 MicroBeads and enriched for CD34<sup>+</sup> cells using LS  
437 columns. MNCs were stained for surface CD34 and CD38, and 3000 HSCs (CD38<sup>lo/-</sup> CD34<sup>+</sup>)  
438 were sorted into 96-well plates into CellGenix TM GMP SCGM medium supplemented with  
439 2.5% FBS, human FLT3L, human SCF, and human IL-3 (all 2.5 ng/ml) containing 1x10<sup>5</sup>  
440 MOLM-13 cells, and cultivated at 37°C 5% CO<sub>2</sub> in duplicates with or without 1 uM 78c. Next  
441 day, the cells were stained with anti CD34, CD38 antibodies. Cell cycle was analyzed using  
442 staining for Ki67 and DAPI as described before (26).

#### 443 **Bulk RNA sequencing**

444 A total of 2000 LT-HSCs (LSK CD48<sup>-</sup> CD150<sup>+</sup> CD34<sup>-</sup> CD201<sup>+</sup>) that were CD38<sup>+</sup> or CD38<sup>-</sup> were  
445 sorted (pooled cells from 10 mice per sample). Bulk RNA sequencing was performed as  
446 previously described (26). Illumina sequencing was done on a Nextseq500 with an average  
447 sample sequencing depth of 60 million reads.

#### 448 **Transcriptome Mapping**

449 Low quality nucleotides were removed with Illumina fastq filter  
450 ([http://cancan.cshl.edu/labmembers/gordon/fastq\\_illumina\\_filter/](http://cancan.cshl.edu/labmembers/gordon/fastq_illumina_filter/)). Reads were further  
451 subjected adaptor trimming using cutadapt (57). Alignment of the reads to the Mouse genome  
452 was done using STAR Aligner (58) using the parameters: "--runMode alignReads --  
453 outSAMstrandField intronMotif --outSAMtype BAM SortedByCoordinate --readFilesCommand  
454 zcat". Mouse Genome version GRCm38 (release M12 GENCODE) was used for the  
455 alignment. HTSeq-0.6.1p1 (59) was used to count the reads that map to the genes in the  
456 aligned sample files. Read Quantification was performed using the parameters: 'htseq-count

457 -f bam -s reverse -m union -a 20'. The GTF file (gencode.vM12.annotation.gtf) used for read  
458 quantification was downloaded from Gencode (60).

### 459 **Differential Expression Analysis**

460 Gene centric differential expression analysis was performed using DESeq2\_1.8.1 (61).  
461 Volcano plot was created using ggplot2\_1.0.1 (62). Heatmaps were generated using  
462 ComplexHeatmap package of R/Bioconductor (63).

### 463 **Gene enrichment analysis**

464 Pathway and functional analyses were performed using GSEA (64). GSEA is a stand-alone  
465 software with a GUI. To run GSEA, a ranked list of all the genes from DESeq2 based  
466 calculations was created by taking the  $-\log_{10}$  of the p-value and multiplying it with the sign the  
467 of the fold change. This ranked list was then queried against MsigDB (65).

### 468 **Data**

469 For original data, please contact the corresponding author. Bulk and single-cell RNA-  
470 sequencing data are available at GEO under accession numbers GSE196760 and  
471 GSE196759 respectively.

### 472 **Statistics**

473 Data are presented as mean  $\pm$  SEM. Significance was calculated using the Mann-Whitney U  
474 test, unless stated otherwise. All statistical analyses were performed using GraphPad Prism  
475 8.2.1 for Windows (GraphPad Software, La Jolla, CA; [www.graphpad.com](http://www.graphpad.com)).

### 476 **Study approval**

477 Animal experiments were performed in accordance with the German animal welfare legislation  
478 and were approved by the "Landesdirektion Sachsen".

479 Additional and detailed descriptions of procedures can be found in supplemental Methods.

## 480 **Author contributions**

481 T.G. designed the study and supervised research; L.I., T.G., performed most of the  
482 experiments, analyzed, and interpreted data and wrote the manuscript; A.G. performed the  
483 long-term label retention experiment; J.A.P.V., L.M. and R.W. performed experiments; S.P.S.,  
484 S.E.E. analyzed and interpreted single-cell RNA sequencing data; A.S. analyzed bulk deep  
485 sequencing data; M.W. and M. von B. participated in scientific discussion and data  
486 interpretation; S.R and A.D. performed next generation sequencing; J.S. and F.L. provided  
487 CD38KO mice; B.W. contributed to the study design and edited the manuscript; T.G., B.W.,  
488 M.B., and M.S. organized research and interpreted data. T.C. interpreted data and edited the  
489 manuscript. All authors discussed the results and commented on the manuscript.

## 490 **Acknowledgements**

491 The figures 2D, 3C, 3D, 4B, 4G, 4K, 6A, 6H, S3G, S3L were created using BioRender.com.  
492 We thank Anja Krüger and Robert Kuhnert for technical assistance, Core Facility Cellular  
493 Imaging at Faculty of Medicine, TU Dresden as well as Deep Sequencing Facility, DRESDEN-  
494 *concept* Genome Center. This work was supported by a grant from the DFG (GR 4857/2-1)  
495 and Mildred-Scheel-Nachwuchszentrum fellowship to T.G. and WI3291/5-1, 12-1 and 13-1 to  
496 B.W. T.C. is supported by the DFG (TRR332, project B4). S.P.S. was supported by FNRS  
497 (40005588 – MISU-PROL) and Jaumotte-Demoulin Foundation. S.E.E. was supported by PhD  
498 Fellowship from FNRS (40006730 – ASP). English language and content editing was provided  
499 by Vasuprada Iyengar.

## 500 **References**

- 501 1. Glimm H, et al. Human hematopoietic stem cells stimulated to proliferate in vitro lose  
502 engraftment potential during their S/G(2)/M transit and do not reenter G(0). *Blood*.  
503 2000;96(13):4185-93.
- 504 2. Nygren JM, and Bryder D. A novel assay to trace proliferation history in vivo reveals that  
505 enhanced divisional kinetics accompany loss of hematopoietic stem cell self-renewal. *PLoS*  
506 *One*. 2008;3(11):e3710.
- 507 3. Qiu J, et al. Divisional history and hematopoietic stem cell function during homeostasis. *Stem*  
508 *Cell Reports*. 2014;2(4):473-90.

- 509 4. Wilson A, et al. Hematopoietic stem cells reversibly switch from dormancy to self-renewal  
510 during homeostasis and repair. *Cell*. 2008;135(6):1118-29.
- 511 5. Foudi A, et al. Analysis of histone 2B-GFP retention reveals slowly cycling hematopoietic stem  
512 cells. *Nat Biotechnol*. 2009;27(1):84-90.
- 513 6. Cabezas-Wallscheid N, et al. Vitamin A-Retinoic Acid Signaling Regulates Hematopoietic Stem  
514 Cell Dormancy. *Cell*. 2017;169(5):807-23 e19.
- 515 7. Essers MA, et al. IFN $\alpha$  activates dormant haematopoietic stem cells in vivo. *Nature*.  
516 2009;458(7240):904-8.
- 517 8. Zhang YW, et al. Hyaluronic acid–GPC5C signalling promotes dormancy in haematopoietic  
518 stem cells. *Nature Cell Biology*. 2022;24(7):1038-48.
- 519 9. Fukushima T, et al. Discrimination of Dormant and Active Hematopoietic Stem Cells by G0  
520 Marker Reveals Dormancy Regulation by Cytoplasmic Calcium. *Cell Rep*. 2019;29(12):4144-58  
521 e7.
- 522 10. Stuart T, et al. Comprehensive Integration of Single-Cell Data. *Cell*. 2019;177(7):1888-902 e21.
- 523 11. Hao Y, et al. Integrated analysis of multimodal single-cell data. *Cell*. 2021;184(13):3573-87  
524 e29.
- 525 12. Sanjuan-Pla A, et al. Platelet-biased stem cells reside at the apex of the haematopoietic stem-  
526 cell hierarchy. *Nature*. 2013;502(7470):232-6.
- 527 13. Balazs AB, et al. Endothelial protein C receptor (CD201) explicitly identifies hematopoietic  
528 stem cells in murine bone marrow. *Blood*. 2006;107(6):2317-21.
- 529 14. Wilson NK, et al. Combined Single-Cell Functional and Gene Expression Analysis Resolves  
530 Heterogeneity within Stem Cell Populations. *Cell Stem Cell*. 2015;16(6):712-24.
- 531 15. Gazit R, et al. Fgd5 identifies hematopoietic stem cells in the murine bone marrow. *J Exp Med*.  
532 2014;211(7):1315-31.
- 533 16. Zou P, et al. p57(Kip2) and p27(Kip1) cooperate to maintain hematopoietic stem cell  
534 quiescence through interactions with Hsc70. *Cell Stem Cell*. 2011;9(3):247-61.
- 535 17. Matsumoto A, et al. p57 is required for quiescence and maintenance of adult hematopoietic  
536 stem cells. *Cell Stem Cell*. 2011;9(3):262-71.
- 537 18. Yamazaki S, et al. TGF- $\beta$  as a candidate bone marrow niche signal to induce hematopoietic  
538 stem cell hibernation. *Blood*. 2009;113(6):1250-6.
- 539 19. Grinenko T, et al. Clonal expansion capacity defines two consecutive developmental stages of  
540 long-term hematopoietic stem cells. *J Exp Med*. 2014;211(2):209-15.
- 541 20. Morita Y, et al. Heterogeneity and hierarchy within the most primitive hematopoietic stem  
542 cell compartment. *J Exp Med*. 2010;207(6):1173-82.
- 543 21. Morcos MNF, et al. SCA-1 Expression Level Identifies Quiescent Hematopoietic Stem and  
544 Progenitor Cells. *Stem Cell Reports*. 2017;8(6):1472-8.
- 545 22. Rabe JL, et al. CD34 and EPCR coordinately enrich functional murine hematopoietic stem cells  
546 under normal and inflammatory conditions. *Exp Hematol*. 2020;81:1-15 e6.
- 547 23. Oguro H, et al. SLAM family markers resolve functionally distinct subpopulations of  
548 hematopoietic stem cells and multipotent progenitors. *Cell Stem Cell*. 2013;13(1):102-16.
- 549 24. Morcos MNF, et al. Continuous mitotic activity of primitive hematopoietic stem cells in adult  
550 mice. *J Exp Med*. 2020;217(6).
- 551 25. Liang R, et al. Restraining Lysosomal Activity Preserves Hematopoietic Stem Cell Quiescence  
552 and Potency. *Cell Stem Cell*. 2020;26(3):359-76 e7.
- 553 26. Ramasz B, et al. Hematopoietic stem cell response to acute thrombocytopenia requires  
554 signaling through distinct receptor tyrosine kinases. *Blood*. 2019;134(13):1046-58.
- 555 27. Graeff R, et al. Mechanism of cyclizing NAD to cyclic ADP-ribose by ADP-ribosyl cyclase and  
556 CD38. *J Biol Chem*. 2009;284(40):27629-36.
- 557 28. Tarrago MG, et al. A Potent and Specific CD38 Inhibitor Ameliorates Age-Related Metabolic  
558 Dysfunction by Reversing Tissue NAD(+) Decline. *Cell Metab*. 2018;27(5):1081-95 e10.

- 559 29. Huang C, et al. Extracellular Adenosine Diphosphate Ribose Mobilizes Intracellular Ca<sup>2+</sup> via  
560 Purinergic-Dependent Ca<sup>2+</sup> Pathways in Rat Pulmonary Artery Smooth Muscle Cells. *Cellular*  
561 *Physiology and Biochemistry*. 2015;37(5):2043-59.
- 562 30. Ernst IM, et al. Adenine Dinucleotide Second Messengers and T-lymphocyte Calcium Signaling.  
563 *Front Immunol*. 2013;4:259.
- 564 31. Lee HC. Cyclic ADP-ribose: a new member of a super family of signalling cyclic nucleotides. *Cell*  
565 *Signal*. 1994;6(6):591-600.
- 566 32. Reya T, et al. Stem cells, cancer, and cancer stem cells. *Nature*. 2001;414(6859):105-11.
- 567 33. Copley MR, et al. The Lin28b-let-7-Hmga2 axis determines the higher self-renewal potential  
568 of fetal haematopoietic stem cells. *Nat Cell Biol*. 2013;15(8):916-25.
- 569 34. Kumar P, et al. HMGA2 promotes long-term engraftment and myeloerythroid differentiation  
570 of human hematopoietic stem and progenitor cells. *Blood Adv*. 2019;3(4):681-91.
- 571 35. Pineault N, et al. Differential expression of Hox, Meis1, and Pbx1 genes in primitive cells  
572 throughout murine hematopoietic ontogeny. *Exp Hematol*. 2002;30(1):49-57.
- 573 36. Venkatraman A, et al. Maternal imprinting at the H19-Igf2 locus maintains adult  
574 haematopoietic stem cell quiescence. *Nature*. 2013;500(7462):345-9.
- 575 37. Renders S, et al. Niche derived netrin-1 regulates hematopoietic stem cell dormancy via its  
576 receptor neogenin-1. *Nat Commun*. 2021;12(1):608.
- 577 38. Brown JR, et al. Fos family members induce cell cycle entry by activating cyclin D1. *Mol Cell*  
578 *Biol*. 1998;18(9):5609-19.
- 579 39. Monje P, et al. Regulation of the transcriptional activity of c-Fos by ERK. A novel role for the  
580 prolyl isomerase PIN1. *J Biol Chem*. 2005;280(42):35081-4.
- 581 40. Aikawa Y, et al. Treatment of arthritis with a selective inhibitor of c-Fos/activator protein-1.  
582 *Nat Biotechnol*. 2008;26(7):817-23.
- 583 41. Kowalczyk MS, et al. Single-cell RNA-seq reveals changes in cell cycle and differentiation  
584 programs upon aging of hematopoietic stem cells. *Genome Res*. 2015;25(12):1860-72.
- 585 42. Challen GA, and Goodell MA. Promiscuous expression of H2B-GFP transgene in hematopoietic  
586 stem cells. *PLoS One*. 2008;3(6):e2357.
- 587 43. Pinho S, and Frenette PS. Haematopoietic stem cell activity and interactions with the niche.  
588 *Nature Reviews Molecular Cell Biology*. 2019;20(5):303-20.
- 589 44. Konen JM, et al. The Good, the Bad and the Unknown of CD38 in the Metabolic  
590 Microenvironment and Immune Cell Functionality of Solid Tumors. *Cells*. 2019;9(1):52.
- 591 45. Miraki-Moud F, et al. Acute myeloid leukemia does not deplete normal hematopoietic stem  
592 cells but induces cytopenias by impeding their differentiation. *Proceedings of the National*  
593 *Academy of Sciences*. 2013;110(33):13576-81.
- 594 46. J.Y.H C, et al. Phosphorylation of transcription factor CREB mediates c-fos induction elicited  
595 by sustained hypertension in rat nucleus tractus solitarii. *Neuroscience*. 1999;88(4):1199-212.
- 596 47. Kovary K, and Bravo R. The jun and fos protein families are both required for cell cycle  
597 progression in fibroblasts. *Mol Cell Biol*. 1991;11(9):4466-72.
- 598 48. Miao GG, and Curran T. Cell transformation by c-fos requires an extended period of expression  
599 and is independent of the cell cycle. *Mol Cell Biol*. 1994;14(6):4295-310.
- 600 49. Lord KA, et al. Proto-oncogenes of the fos/jun family of transcription factors are positive  
601 regulators of myeloid differentiation. *Mol Cell Biol*. 1993;13(2):841-51.
- 602 50. Kesarwani M, et al. Targeting c-FOS and DUSP1 abrogates intrinsic resistance to tyrosine-  
603 kinase inhibitor therapy in BCR-ABL-induced leukemia. *Nat Med*. 2017;23(4):472-82.
- 604 51. Velten L, et al. Identification of leukemic and pre-leukemic stem cells by clonal tracking from  
605 single-cell transcriptomics. *Nature Communications*. 2021;12(1).
- 606 52. Grinenko T, et al. Hematopoietic stem cells can differentiate into restricted myeloid  
607 progenitors before cell division in mice. *Nat Commun*. 2018;9(1):1898.
- 608 53. Basak O, et al. Mapping early fate determination in Lgr5 + crypt stem cells using a novel K i67-  
609 RFP allele. *The EMBO Journal*. 2014;33(18):2057-68.



- 610 54. Qiu X, et al. Single-cell mRNA quantification and differential analysis with Census. *Nat*  
611 *Methods*. 2017;14(3):309-15.
- 612 55. Chen EY, et al. Enrichr: interactive and collaborative HTML5 gene list enrichment analysis tool.  
613 *BMC Bioinformatics*. 2013;14:128.
- 614 56. Schindelin J, et al. Fiji: an open-source platform for biological-image analysis. *Nat Methods*.  
615 2012;9(7):676-82.
- 616 57. Martin M. Cutadapt removes adapter sequences from high-throughput sequencing reads.  
617 *EMBnetjournal*. 2011;17(1):10.
- 618 58. Dobin A, et al. STAR: ultrafast universal RNA-seq aligner. *Bioinformatics*. 2013;29(1):15-21.
- 619 59. Anders S, et al. HTSeq--a Python framework to work with high-throughput sequencing data.  
620 *Bioinformatics*. 2015;31(2):166-9.
- 621 60. GENCODE. GENCODE reference annotation for the human and mouse genomes, Release M12  
622 (GRCm38.p5). [https://www.encodegenes.org/mouse/release\\_M12.html](https://www.encodegenes.org/mouse/release_M12.html).
- 623 61. Anders S, and Huber W. Differential expression analysis for sequence count data. *Genome*  
624 *Biol*. 2010;11(10):R106.
- 625 62. Wickham H. *ggplot2: elegant graphics for data analysis*. Springer-Verlag New York; 2016.
- 626 63. Gu Z, et al. Complex heatmaps reveal patterns and correlations in multidimensional genomic  
627 data. *Bioinformatics*. 2016;32(18):2847-9.
- 628 64. Subramanian A, et al. Gene set enrichment analysis: a knowledge-based approach for  
629 interpreting genome-wide expression profiles. *Proc Natl Acad Sci U S A*. 2005;102(43):15545-  
630 50.
- 631 65. Liberzon A, et al. Molecular signatures database (MSigDB) 3.0. *Bioinformatics*.  
632 2011;27(12):1739-40.

633

634

635

636

637

638

639

640

641

642

643

644



Figure 1

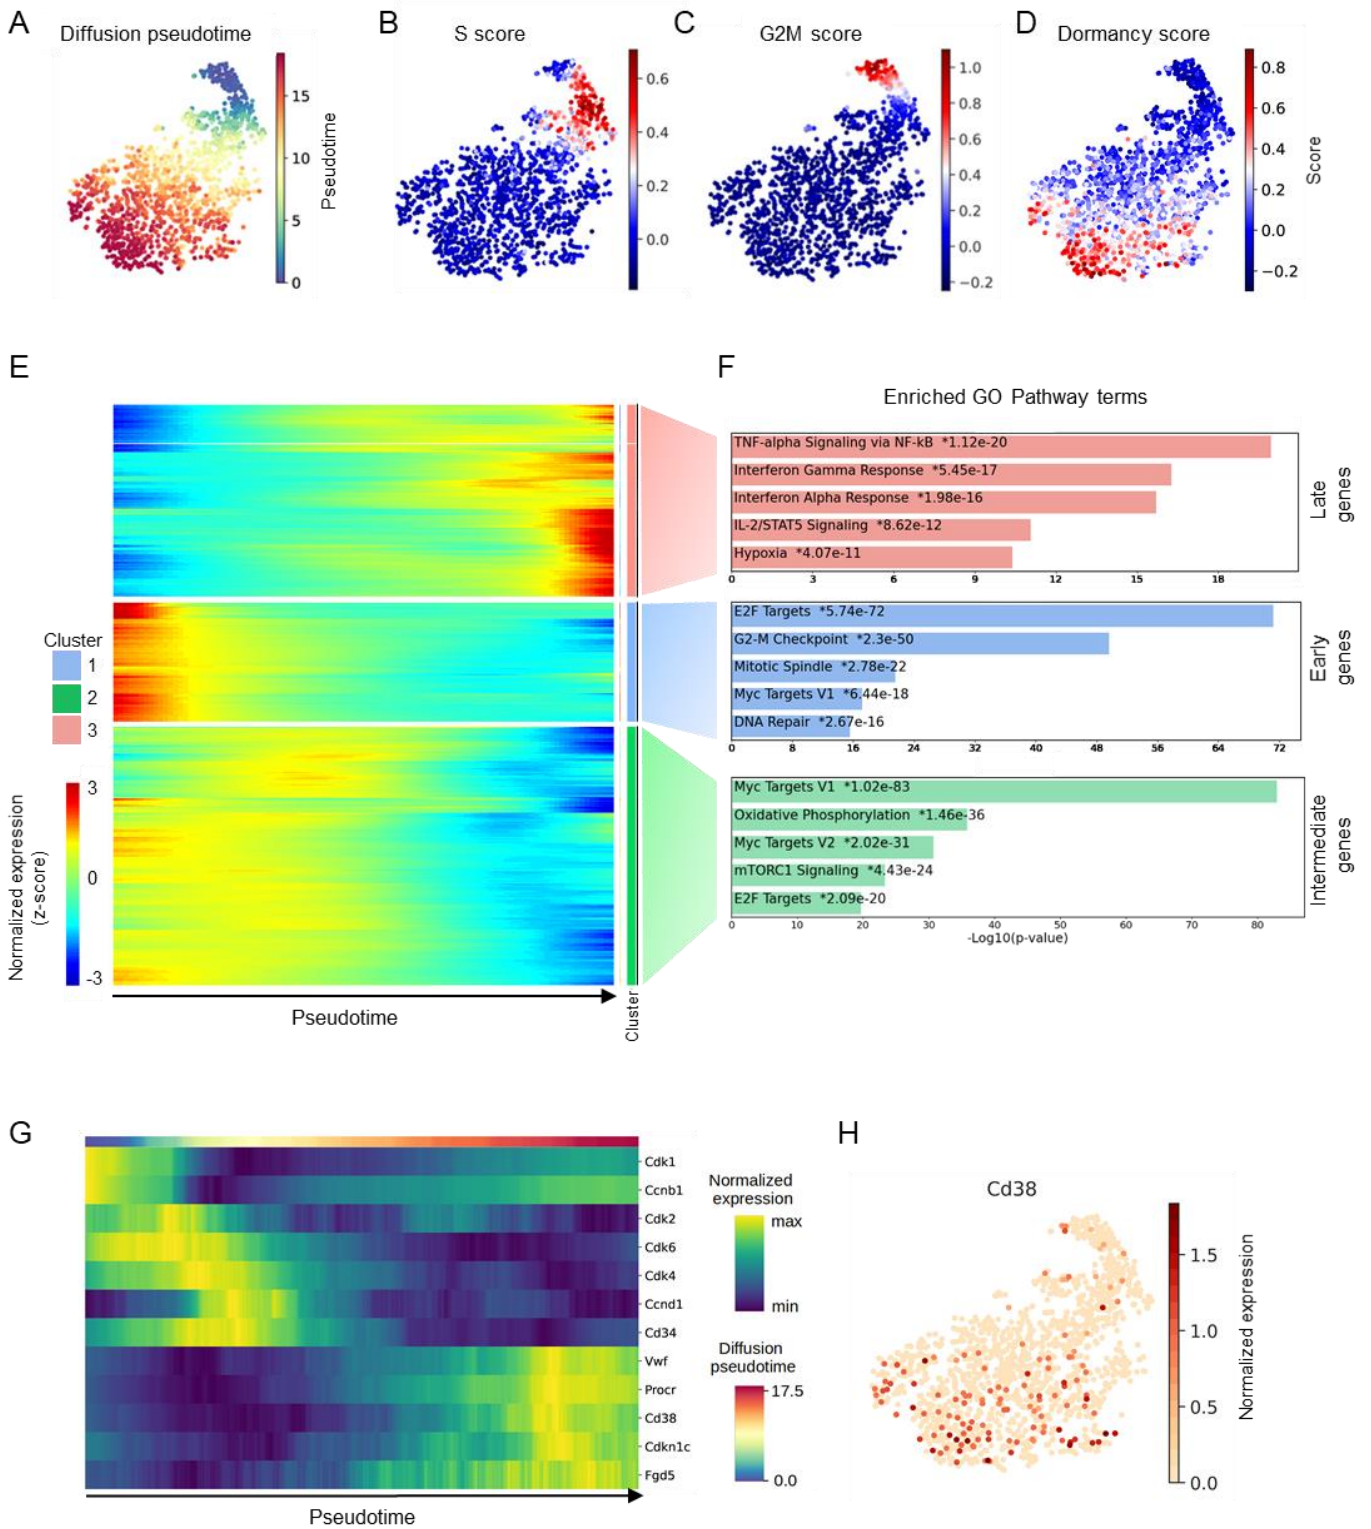

645

646

647

648 **Figure 1. Single cell transcriptome analysis of HSCs**

649 (A) Uniform manifold approximation projection (UMAP) representation depicting the  
650 transcriptional profiles of individual HSCs (LSK CD48<sup>-</sup> CD150<sup>+</sup>). (B) S-phase score along  
651 pseudotime. (C) G2/M phase score along pseudotime. (D) Dormancy score along pseudotime.  
652 For panels A-D, each dot represents a single cell. (E) Clustered heatmap showing expression  
653 of genes along pseudotime. Each column represents a single cell and each row represents a  
654 single gene. (F) The first five most-significantly enriched pathways in each cluster are shown.  
655 (G) Expression of selected genes along pseudotime. (H) UMAP representation showing the  
656 expression of *Cd38*. Each dot represents a single cell.

657

658

659

660

661

662

663

664

665

666

667

668

669

670

Figure 2

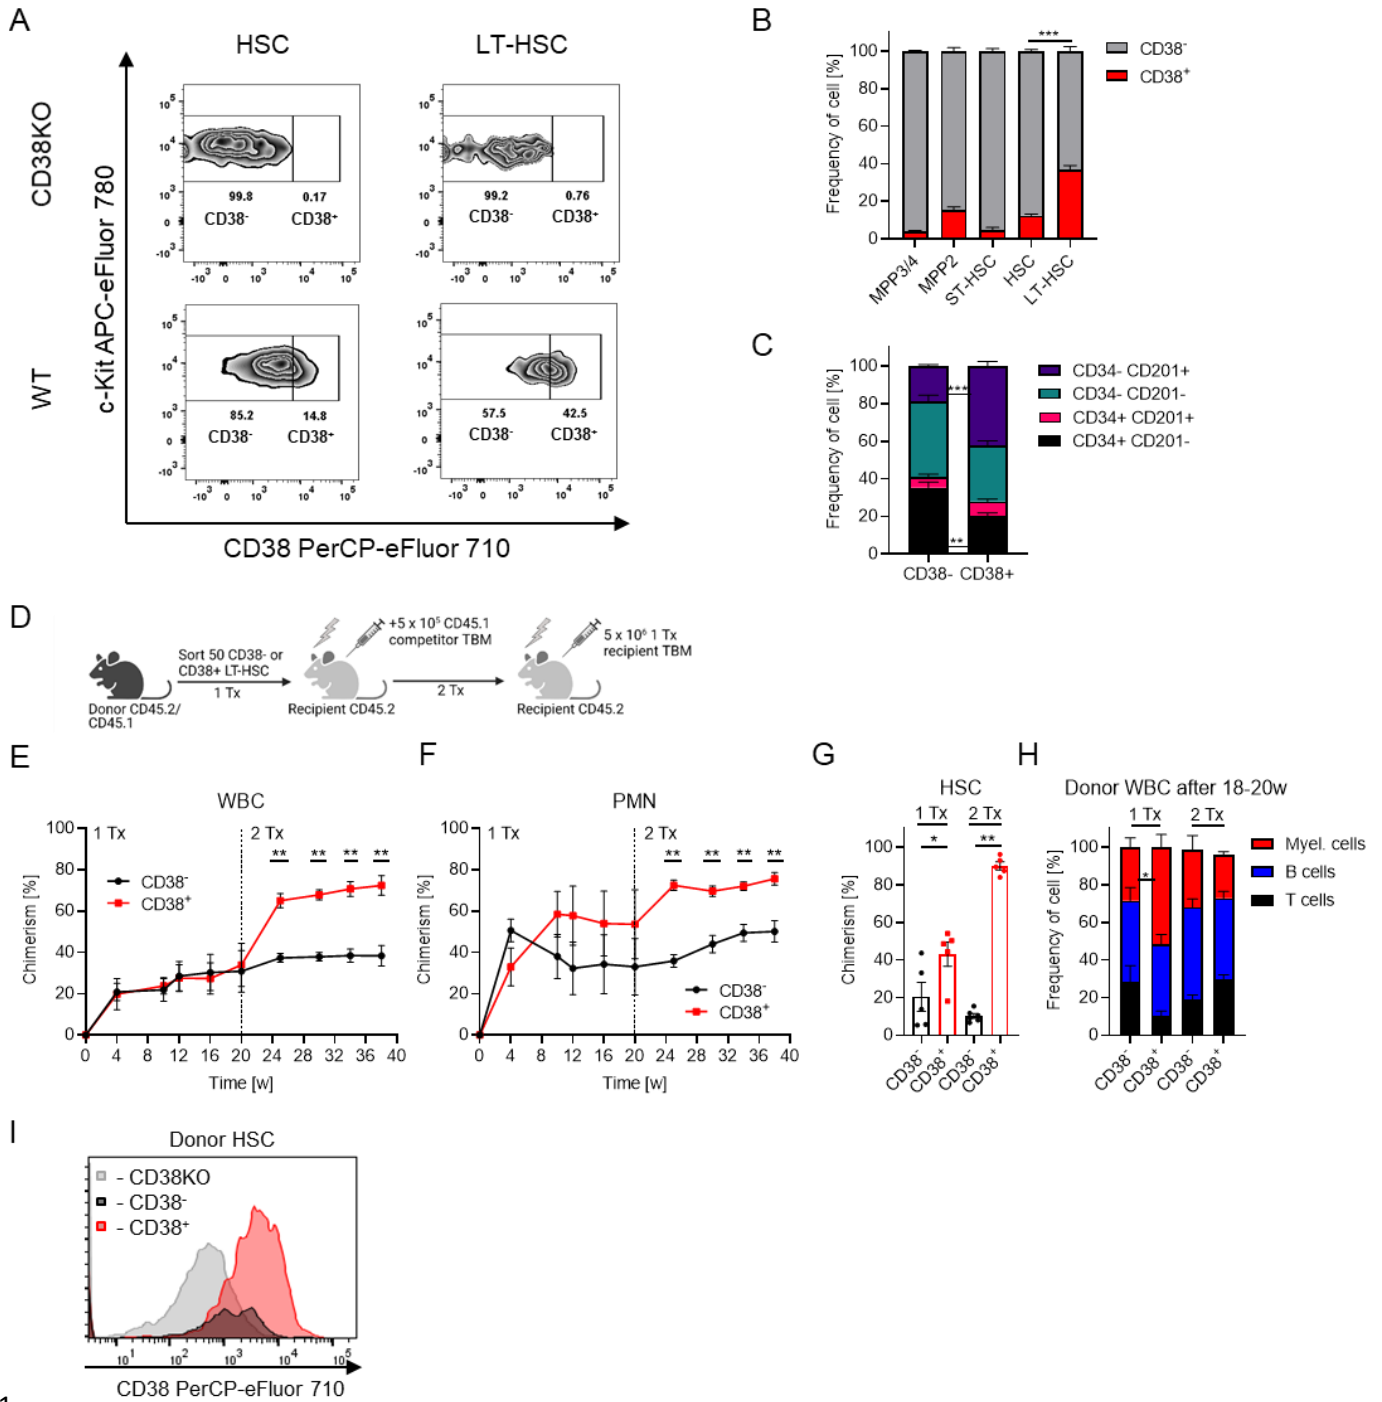

671

672

673

674

675

676 **Figure 2. CD38<sup>+</sup> defines LT-HSCs with the highest long-term repopulation capacity**

677 (A) Flow cytometry analysis of CD38 expression on HSCs (LSK CD48<sup>-</sup> CD150<sup>+</sup>) and LT-  
678 HSCs (LSK CD48<sup>-</sup> CD150<sup>+</sup> CD34<sup>-</sup> CD201<sup>+</sup>) in CD38KO (negative control for staining) vs wt  
679 mice. (B) Frequency of CD38<sup>+</sup> cells in various HSPC populations, n=7. Multiple-group  
680 comparisons were performed using Brown-Forsythe and Welch ANOVA followed by Dunnett's  
681 T3 multiple comparison tests. \*\*\*p<0.001. (C) Frequencies of different HSC subpopulations in  
682 CD38<sup>-</sup> and CD38<sup>+</sup> HSCs, n=7. (D) Set-up for CD38<sup>-</sup> and CD38<sup>+</sup> LT-HSCs (LSK CD48<sup>-</sup> CD150<sup>+</sup>  
683 CD201<sup>+</sup> CD34<sup>-</sup>) transplantation, 2 independent experiments, 1 representative experiment is  
684 shown, n=5. (E) Chimerism in donor-derived WBC cells after transplantation. (F) Chimerism  
685 in donor-derived polymorphonuclear neutrophils (PMN) after transplantation, PMN: Gr1<sup>+</sup>  
686 CD11b<sup>+</sup>. (G) Chimerism in the HSC population after transplantation. (H) Frequency of T, B,  
687 and myeloid cells in donor derived peripheral blood (PB) cells at 18-20 weeks after  
688 transplantation. (I) Surface expression of CD38 in donor-derived HSCs at 20 weeks after  
689 primary transplantation of CD38<sup>+</sup> or CD38<sup>-</sup> LT-HSCs (5 mice pooled), CD38 knock-out HSCs  
690 were used as negative control for CD38 staining. C, E-H - p-value was calculated using Mann-  
691 Whitney *U*-test, \*p<0.05, \*\*p<0.01.

692

693

694

695

696

697

698

699

Figure 3

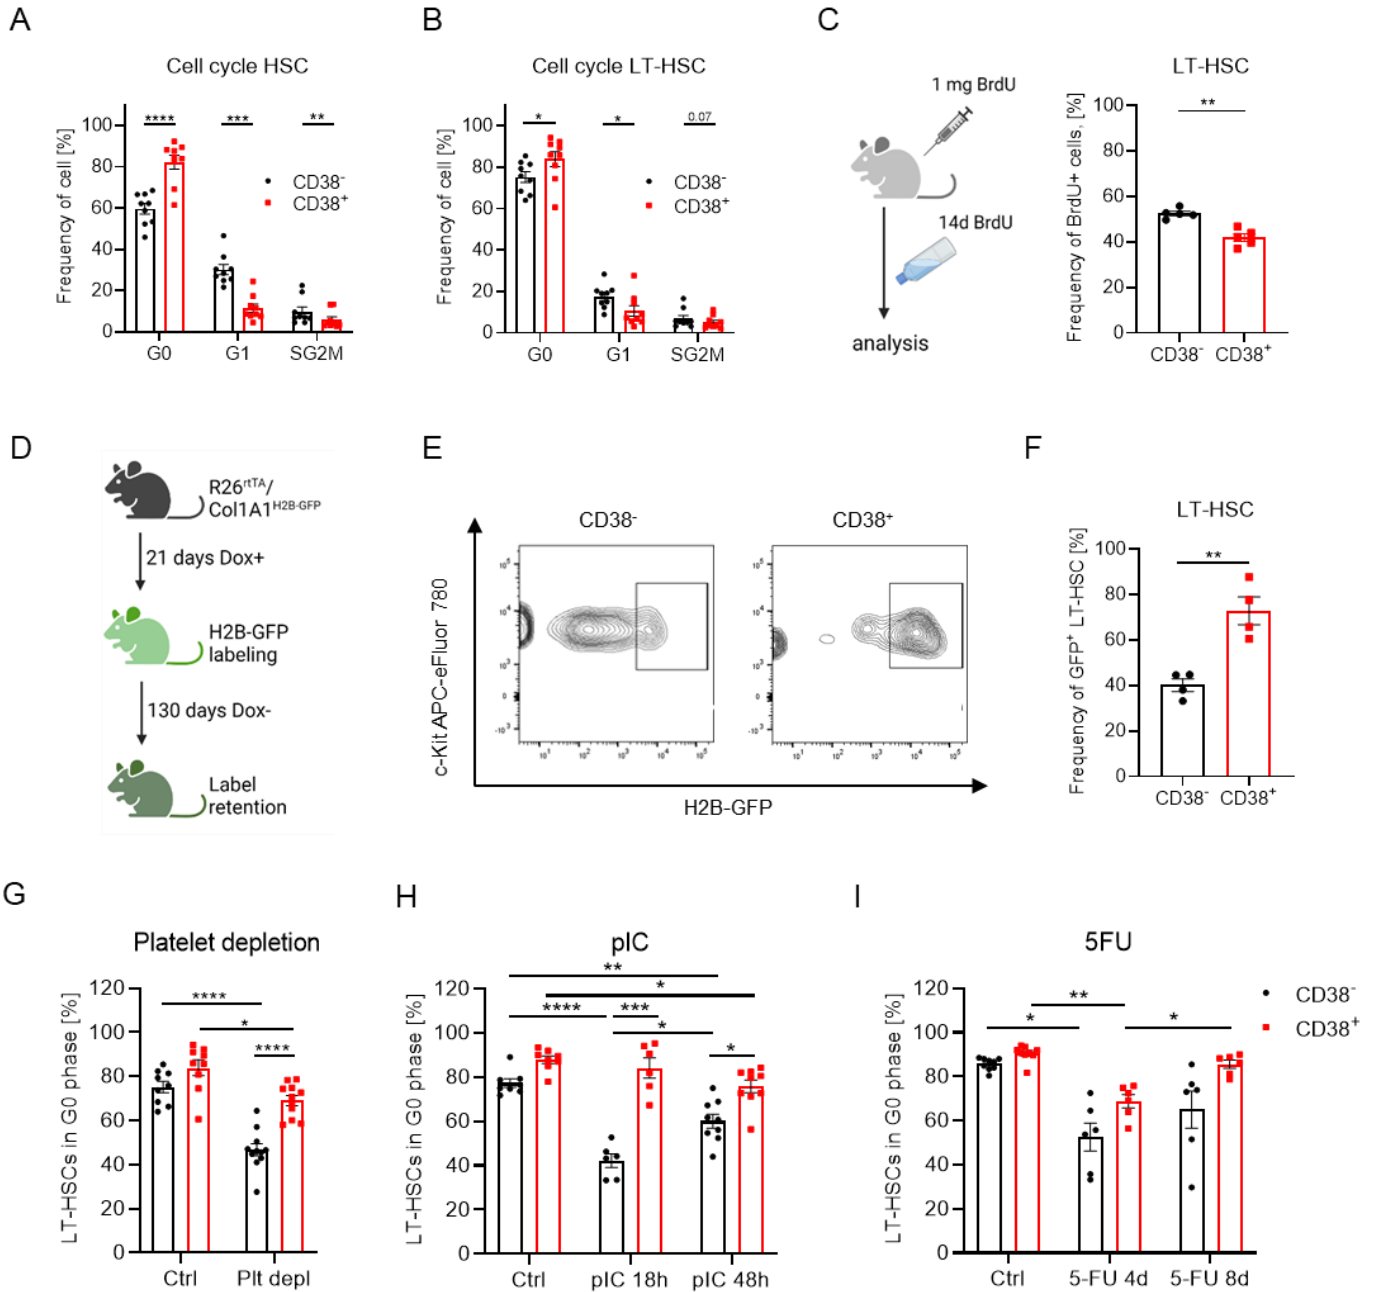

700

701

702

703

704

705

706 **Figure 3. CD38<sup>+</sup> dHSCs reside at the top of LT-HSC hierarchy**

707 (A) Frequencies of CD38<sup>-</sup> and CD38<sup>+</sup> HSCs or LT-HSCs (B) in G0, G1 and SG2M phases  
708 of the cell cycle, n=9. (C) BrdU incorporation assay. Frequency of BrdU<sup>+</sup> cells in CD38<sup>-</sup> and  
709 CD38<sup>+</sup> LT-HSC populations 14d after BrdU, n=5. (D) Set-up of a long-term label retention  
710 assay. (E) Gating strategy for the identification of GFP-retaining LT-HSCs. (F) Frequency of  
711 GFP<sup>+</sup> cells in CD38<sup>-</sup> and CD38<sup>+</sup> LT-HSCs; n=4. (G) Cell cycle analysis of LT-HSCs at 18 h  
712 after platelet depletion (n=10-11; 3 independent experiments). (H) Cell cycle analysis of LT-  
713 HSCs at 18 and 48 h after pIC injection (n=6-9; 3 independent experiments). (I) Cell cycle  
714 analysis of LT-HSCs at days 4 and 8 after 5-FU injection (n=6-11; 3 independent experiments).  
715 For panels A-C, F - the paired *t*-test was used. Multiple-group comparisons were performed  
716 using Brown-Forsythe and Welch ANOVA followed by Dunnett's T3 multiple comparison tests.  
717 \*p<0.05, \*\*p< 0.01, \*\*\*p<0.001, \*\*\*\*p<0.0001.

718

719

720

721

722

723

724

725

726

727

728

Figure 4

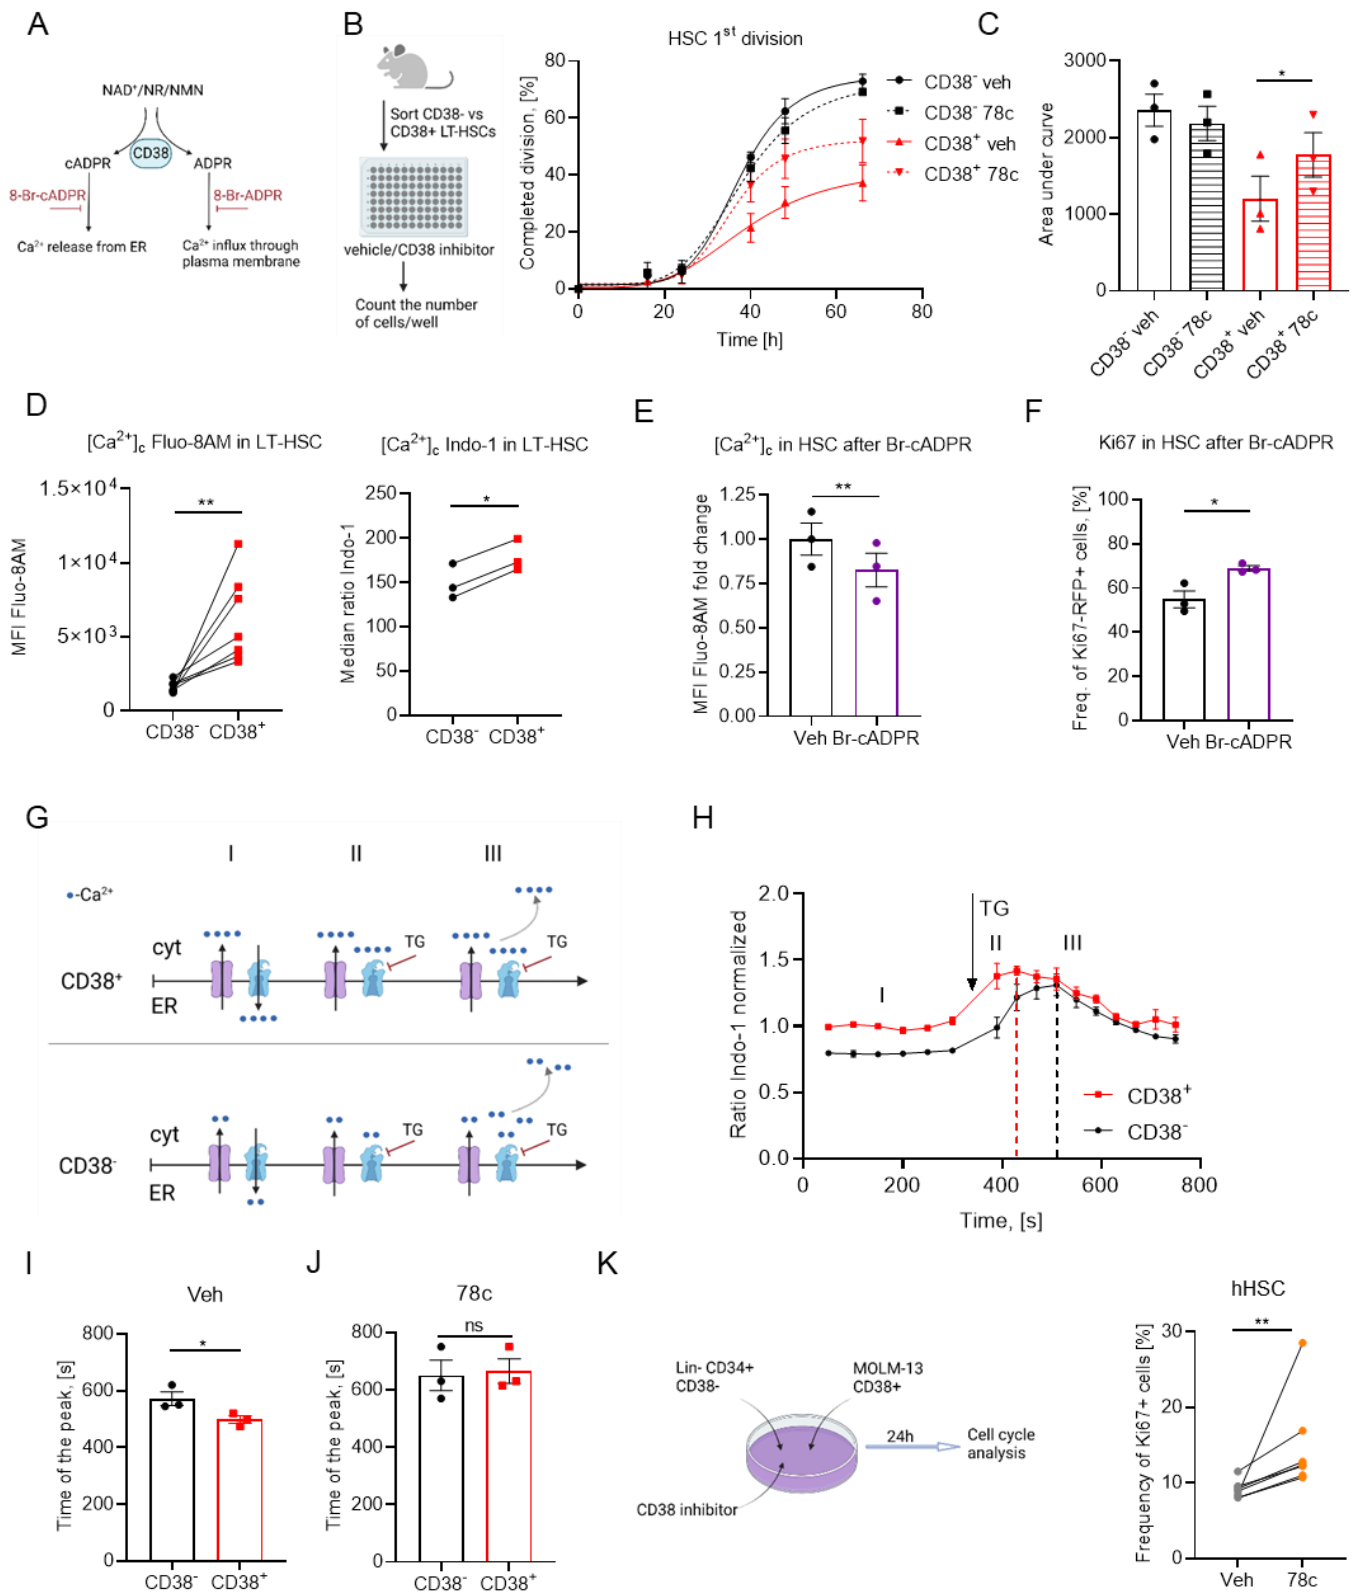

729

730



731 **Figure 4. CD38 enzymatic activity regulates dHSC dormancy**

732 (A) Enzymatic activities of CD38. (B) Single CD38<sup>-</sup> and CD38<sup>+</sup> LT-HSCs were sorted  
733 and cultured in liquid media with or without 78c, a CD38 inhibitor. Frequency of LT-HSCs that  
734 had completed the first division during incubation time is presented (3 independent  
735 experiments). (C) Quantification of AUC for data in panel B. (D) Free cytoplasmic Ca<sup>2+</sup> ([Ca<sup>2+</sup>]<sub>c</sub>)  
736 relative concentration in CD38<sup>+</sup> and CD38<sup>-</sup> LT-HSCs analyzed using Fluo-8AM dye, n=7, and  
737 ratiometric Indo-1 dye, n=3. (E) Relative [Ca<sup>2+</sup>]<sub>c</sub> concentration in HSCs treated with Br-cADPR  
738 for 24 h, n=3. 2 independent experiments. (F) Frequency of cycling in Ki67-RFP<sup>+</sup> HSCs at 24  
739 h after treatment with Br-cADPR, n=3, 2 independent experiments. (G) Suggested model of  
740 [Ca<sup>2+</sup>]<sub>c</sub> modulation. Time frame I: Under steady state conditions, Ca<sup>2+</sup> is released into the  
741 cytoplasm and pumped back into the ER. CD38<sup>+</sup> HSCs release more Ca<sup>2+</sup> from ER than CD38<sup>-</sup>  
742 cells due to cADPR, the product of CD38 enzymatic activity. Time frame II: Blocking Ca<sup>2+</sup>-  
743 ATPase pumping Ca<sup>2+</sup> into the ER with TG led to a faster rise in [Ca<sup>2+</sup>]<sub>c</sub> concentration CD38<sup>+</sup>  
744 HSCs than in CD38<sup>-</sup> cells. Time frame III: excessive [Ca<sup>2+</sup>]<sub>c</sub> is removed from cytoplasm. (H)  
745 [Ca<sup>2+</sup>]<sub>c</sub> dynamics in CD38<sup>-</sup> and CD38<sup>+</sup> HSCs. (I) Time between addition of TG and maximum  
746 [Ca<sup>2+</sup>]<sub>c</sub> in CD38<sup>-</sup> and CD38<sup>+</sup> HSCs, n=3. (J) Time between addition of TG and maximum [Ca<sup>2+</sup>]<sub>c</sub>  
747 in CD38<sup>-</sup> and CD38<sup>+</sup> HSCs in the presence of a CD38 inhibitor, n=3. (K) Co-culture of hHSCs  
748 from healthy adult donors and MOLM-13 in the presence of CD38 inhibitor 78c during 24h.  
749 Cell cycle of hHSCs was analyzed (n=7). For panels C, D, F-J P-values were calculated using  
750 the paired *t*-test; for panel E, the unpaired *t*-test was used; for panel K, the Mann-Whitney *U*-  
751 test was used \**p*<0.05, \*\**p*<0.01.

752

753

754

755

756

Figure 5

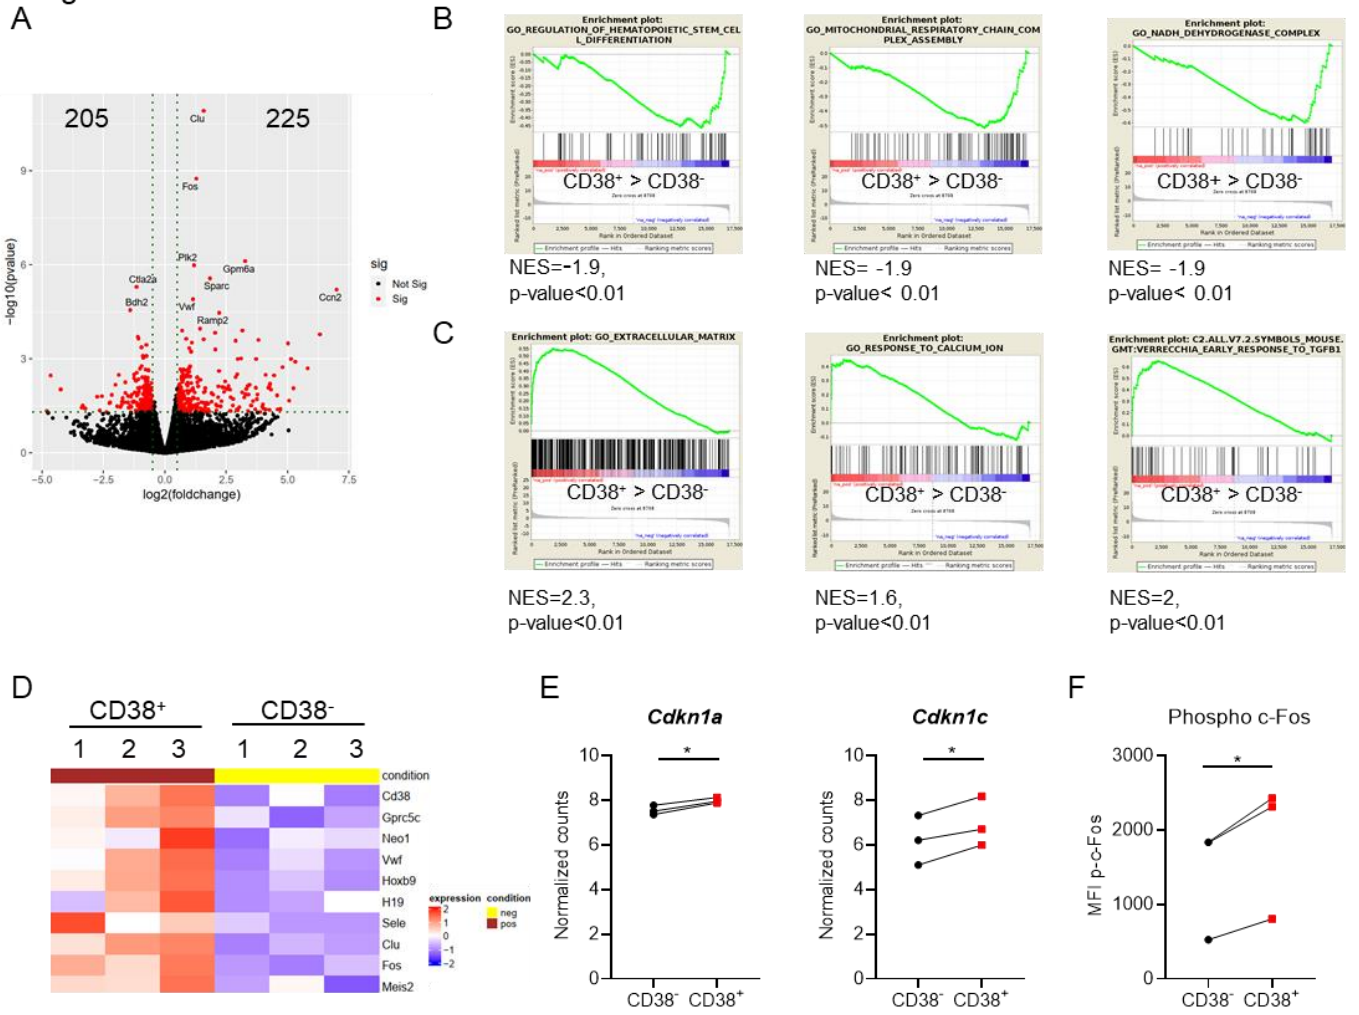

757

758

759

760

761

762

763

764

765

766 **Figure 5. c-Fos is up-regulated in CD38<sup>+</sup> dHSCs**

767 (A) Volcano plot of differentially expressed genes in CD38<sup>+</sup> LT-HSCs compared to CD38<sup>-</sup>  
768 cells. (B) GSEA of down-regulated genes in CD38<sup>+</sup> LT-HSCs compared to CD38<sup>-</sup> stem cells.  
769 (C) GSEA of upregulated genes in CD38<sup>+</sup> LT-HSCs compared to CD38<sup>-</sup> cells. (D) Heat map  
770 depicting dHSCs and cell cycle-related genes expressed in CD38<sup>+</sup> and CD38<sup>-</sup> LT-HSCs. (E)  
771 Normalized expression of *Cdkn1a* and *Cdkn1c* in CD38<sup>+</sup> vs CD38<sup>-</sup> LT-HSCs. P-values were  
772 calculated using the paired *t*-test, \**p*<0.05. (F) MFI of intracellular p-c-Fos in CD38<sup>+</sup> and CD38<sup>-</sup>  
773 HSCs. P-values were calculated using the paired *t*-test; \**p*<0.05.

774

775

776

777

778

779

780

781

782

783

784

785

786

787

788

Figure 6

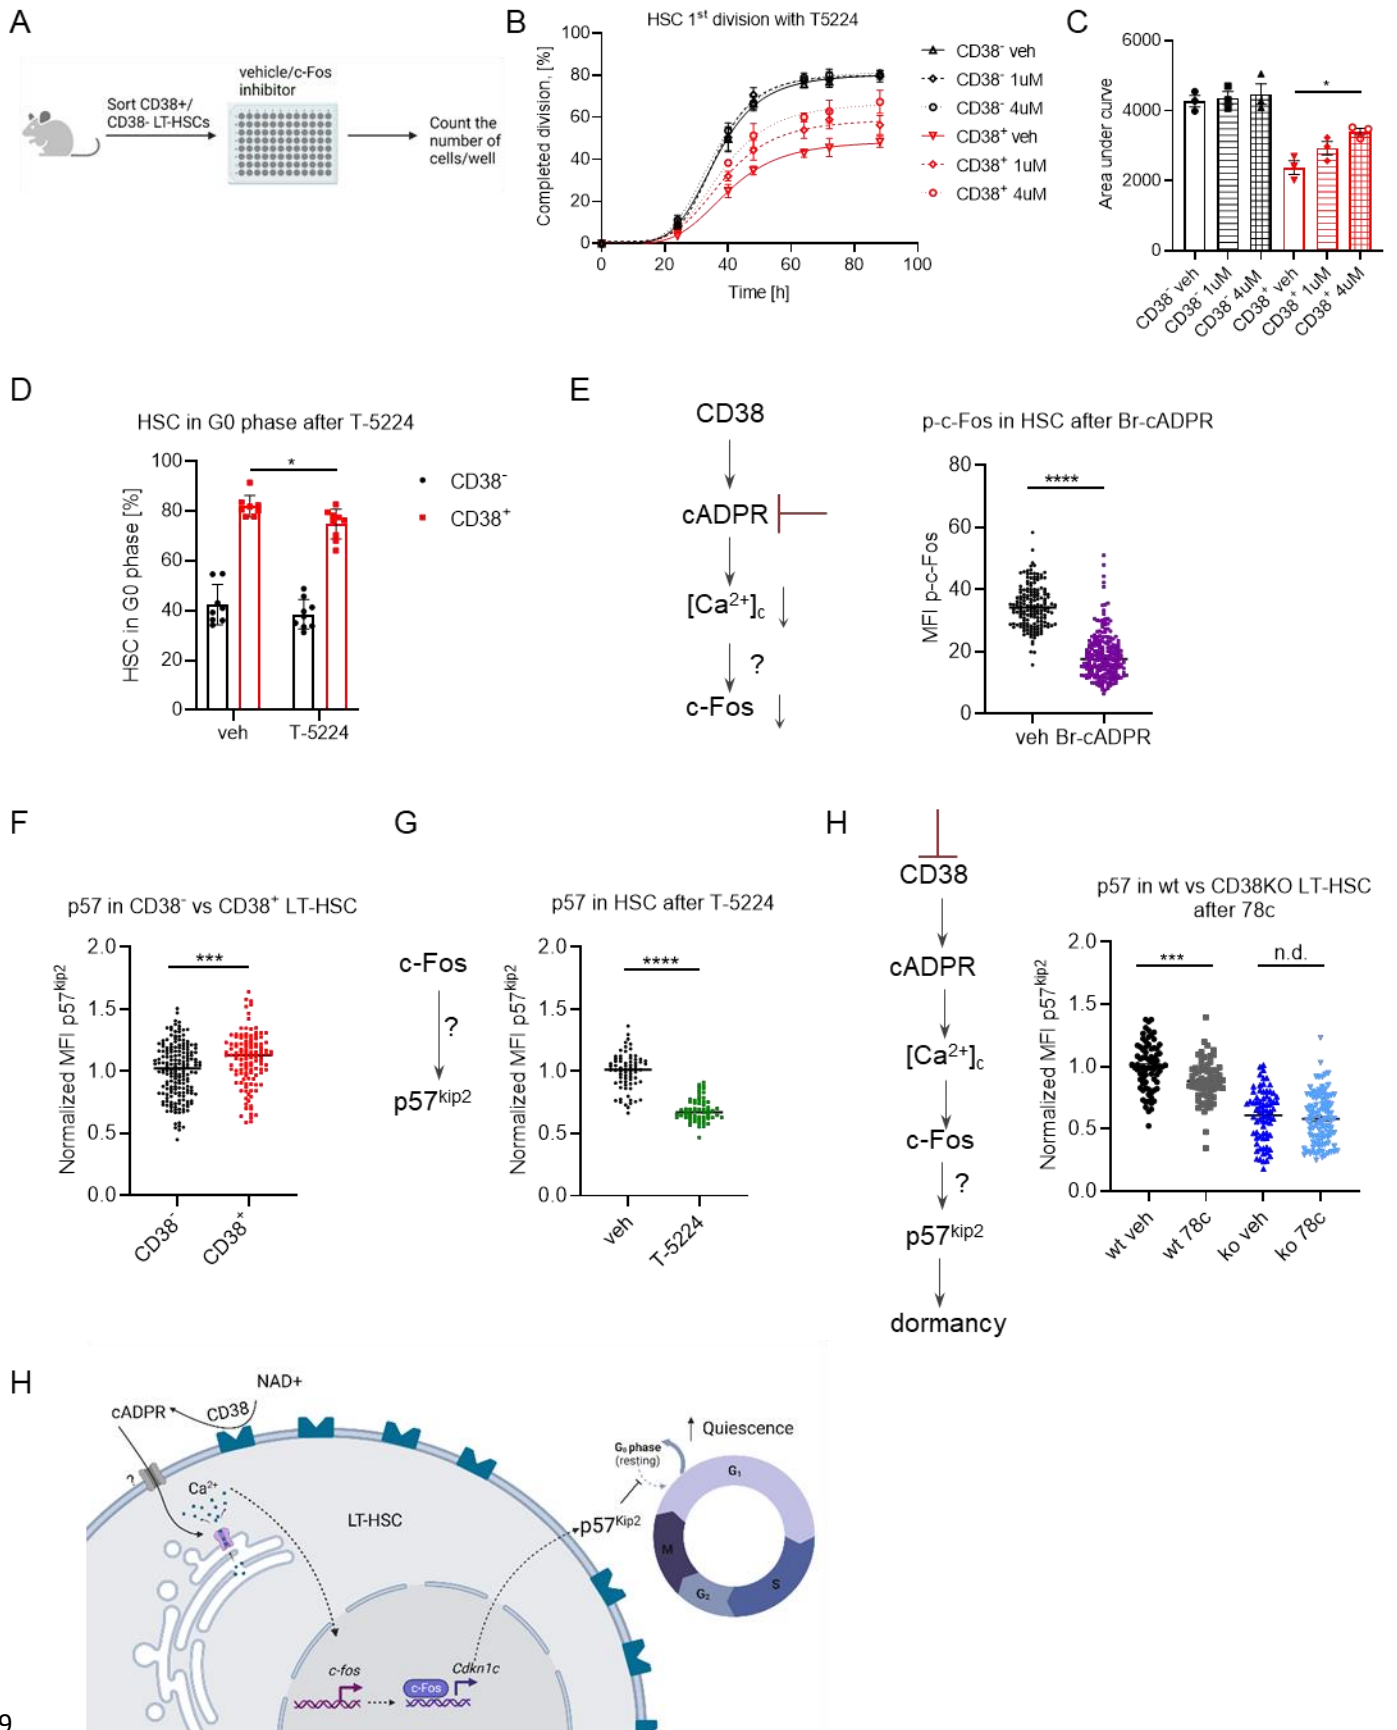

789

790 **Figure 6. c-Fos maintains dHSC dormancy via p57<sup>kip2</sup>**

791 (A) Single CD38<sup>-</sup> and CD38<sup>+</sup> LT-HSCs were sorted and cultured in liquid media with or  
792 without the c-Fos inhibitor, T5224. (B) Frequency of LT-HSCs that had completed the first  
793 division during incubation is presented (3 independent experiments). (C) Quantification of AUC  
794 for data in panel B. P-value was calculated using the paired *t*-test. \**p*<0.05 (D) Cell cycle  
795 analysis of HSCs at 24 h after T-5224 injection, n=8 vs 9, 2 independent experiments. P-value  
796 was calculated using the Mann-Whitney *U*-test, \**p*<0.05 (E) p-c-Fos immunofluorescence in  
797 HSCs after 24 h with or without Br-cADPR *in vitro* (n=164 - veh, 219 - Br-cADPR, 2  
798 independent experiments). (F) Quantification of MFI of p57<sup>kip2</sup> in CD38<sup>+</sup> dHSCs, and CD38<sup>-</sup>  
799 LT-HSCs (n=181 - CD38<sup>-</sup>, 122 - CD38<sup>+</sup>, 2 independent experiments). (G) p57<sup>kip2</sup>  
800 immunofluorescence in HSCs after 24 h with or without c-Fos inhibitor *in vitro* (n=72 - veh, 61  
801 - T-5224, 2 independent experiments). (H) p57<sup>kip2</sup> immunofluorescence in CD38<sup>+</sup> wt vs  
802 CD38KO LT-HSCs after 24 h with or without 78c inhibitor *in vitro* (n=78/68/72/97 for wt veh/wt  
803 78c/ko veh/ko 78c, respectively). For panels E-H, p-values were calculated using unpaired *t*-  
804 test. \*\*\**p*<0.001, \*\*\*\**p*<0.0001.

805
